# Supplementary material for: Tensor decomposition of stimulated monocyte and macrophage gene expression profiles identifies neurodegenerative disease-specific trans-eQTLs
Source: PLOS journal article supplement (doi:10.1371/journal.pgen.1008549), 2020-02-03
Supplement: S2 (10.1371/journal.pgen.1008549.s002) [file journal.pgen.1008549.s002]

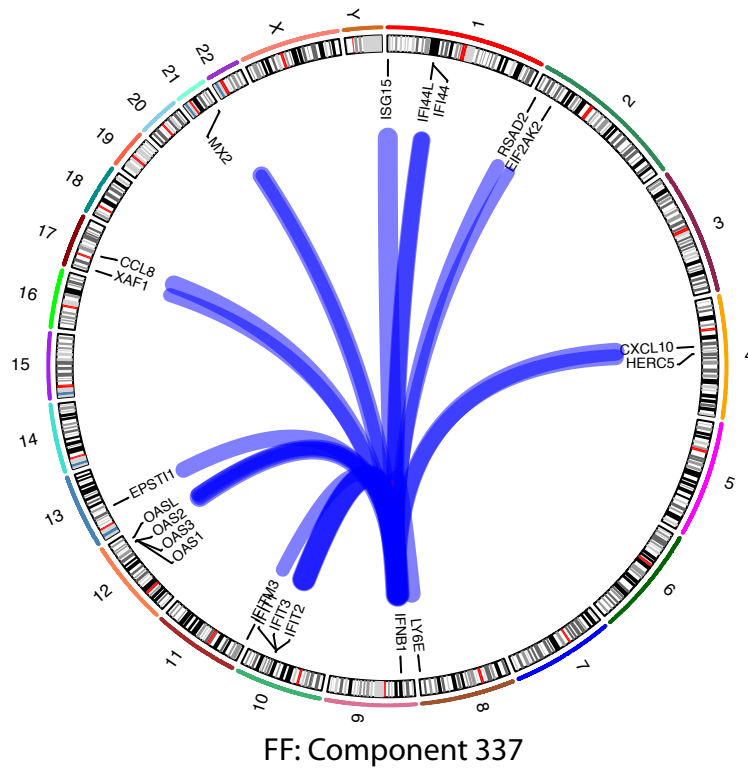

**S2 Fig. Replication of previously identified *trans*-eQTLs in Fairfax *et. al* (2014).** The SNP rs2275888 maps to FF component 337 enriched with type 1 interferon-related genes with a p-value =  $1.7 \times 10^{-9}$  and FDR =  $1 \times 10^{-3}$  and gene network similar to Fairfax *et. al* (2014) study. A *cis*-eQTL at rs2275888 for *IFNB1* is associated with the expression of 17 genes in *trans* after 24-hour LPS stimulation, many of which are interferon response genes.
