# Supplementary material for: Tensor decomposition of stimulated monocyte and macrophage gene expression profiles identifies neurodegenerative disease-specific trans-eQTLs
Source: PLoS Genet. 2020 Feb 3;16(2):e1008549. doi: 10.1371/journal.pgen.1008549 (PMC7018232; doi:10.1371/journal.pgen.1008549)
Supplement: S7 Table — The matrix-eQTL output with SNP, component number, beta, t-stat, P-value and FDR are listed here. Note: The trans-eSNPs are not LD-pruned. (XLSX) [file pgen.1008549.s027.xlsx]

## Sheet: Sheet1
Tensor Myeloid Supplemental Material
SNP	component	beta	t.stat	p.value	FDR
6:32548921	363	1.3174	22.6652	1.1882750901745e-74	1.59248550450522e-66
6:32553849	363	1.22238	22.6262	1.76774407107142e-74	1.59248550450522e-66
6:32561201	363	1.10544	22.0493	6.26131111112357e-72	3.760366049526e-64
6:32559781	363	1.05415	21.4883	1.9113823325574e-69	9.68038155130821e-63
6:32560727	363	1.05495	21.5104	1.52517303015563e-69	9.68038155130821e-63
6:32560859	363	1.05415	21.4883	1.9113823325574e-69	9.68038155130821e-63
6:32560875	363	1.06234	21.6749	2.84765277420849e-70	9.68038155130821e-63
6:32560934	363	1.05418	21.4886	1.90463893699865e-69	9.68038155130821e-63
6:32561495	363	1.05415	21.4883	1.9113823325574e-69	9.68038155130821e-63
6:32561766	363	1.05415	21.4883	1.9113823325574e-69	9.68038155130821e-63
6:32587661	363	1.05415	21.4883	1.9113823325574e-69	9.68038155130821e-63
6:32588630	363	1.05415	21.4883	1.9113823325574e-69	9.68038155130821e-63
6:32588662	363	1.05415	21.4883	1.9113823325574e-69	9.68038155130821e-63
6:32588953	363	1.05415	21.4883	1.9113823325574e-69	9.68038155130821e-63
6:32589000	363	1.05415	21.4883	1.9113823325574e-69	9.68038155130821e-63
6:32589483	363	1.0543	21.4871	1.93423341564618e-69	9.68038155130821e-63
6:32590120	363	1.05415	21.4883	1.9113823325574e-69	9.68038155130821e-63
6:32590248	363	1.05415	21.4883	1.9113823325574e-69	9.68038155130821e-63
6:32590428	363	1.05415	21.4883	1.9113823325574e-69	9.68038155130821e-63
6:32590590	363	1.05415	21.4883	1.9113823325574e-69	9.68038155130821e-63
6:32590612	363	1.05415	21.4883	1.9113823325574e-69	9.68038155130821e-63
6:32590870	363	1.05415	21.4883	1.9113823325574e-69	9.68038155130821e-63
6:32590879	363	1.05415	21.4883	1.9113823325574e-69	9.68038155130821e-63
6:32591128	363	1.05415	21.4883	1.9113823325574e-69	9.68038155130821e-63
6:32591173	363	1.05415	21.4883	1.9113823325574e-69	9.68038155130821e-63
6:32591448	363	1.05415	21.4883	1.9113823325574e-69	9.68038155130821e-63
6:32591566	363	1.05415	21.4883	1.9113823325574e-69	9.68038155130821e-63
6:32592337	363	1.05415	21.4883	1.9113823325574e-69	9.68038155130821e-63
6:32592605	363	1.05415	21.4883	1.9113823325574e-69	9.68038155130821e-63
6:32593033	363	1.05415	21.4883	1.9113823325574e-69	9.68038155130821e-63
6:32594217	363	1.05415	21.4883	1.9113823325574e-69	9.68038155130821e-63
6:32594341	363	1.05415	21.4883	1.9113823325574e-69	9.68038155130821e-63
6:32595097	363	1.05415	21.4883	1.9113823325574e-69	9.68038155130821e-63
6:32595117	363	1.05479	21.4892	1.89365673155224e-69	9.68038155130821e-63
6:32610403	363	1.05555	21.5305	1.24281393793298e-69	9.68038155130821e-63
6:32612161	363	1.05639	21.6447	3.87237127304444e-70	9.68038155130821e-63
6:32592868	363	1.05462	21.4708	2.28505728923631e-69	1.11270864699362e-62
6:32561175	363	1.06201	21.4525	2.75321124181754e-69	1.30539526119771e-62
6:32614037	363	1.05633	21.4426	3.04823064669562e-69	1.40821612297723e-62
6:32590091	363	1.05893	21.4293	3.48943511974694e-69	1.5334067309207e-62
6:32608417	363	1.05559	21.4315	3.41309751283953e-69	1.5334067309207e-62
6:32604108	363	1.05281	21.4154	4.02244475032211e-69	1.72554739126824e-62
6:32612915	363	1.04669	21.4129	4.1270247779931e-69	1.72923777857717e-62
6:32609746	363	1.05288	21.4074	4.36588870861462e-69	1.78774708514582e-62
6:32609673	363	1.05737	21.3881	5.31280289132213e-69	2.12714592474188e-62
6:32589326	363	1.05535	21.3656	6.68744260226369e-69	2.61931861916033e-62
6:32589282	363	1.05508	21.3626	6.89574833912706e-69	2.64344111038943e-62
6:32608473	363	1.0527	21.3474	8.0510306867398e-69	3.02201307369987e-62
6:32611537	363	1.04967	21.3346	9.18024265083117e-69	3.375547119927e-62
6:32611982	363	1.06359	21.3305	9.57333814274504e-69	3.44968538637118e-62
6:32590463	363	1.10602	21.3014	1.28844645958177e-68	4.55179080965758e-62
6:32451822	363	1.23181	21.2976	1.3385832530971e-68	4.63797216510354e-62
6:32561887	363	1.05456	21.2938	1.39234885169809e-68	4.73323737988155e-62
6:32607368	363	1.02873	21.2722	1.73559759119724e-68	5.79083743337766e-62
6:32561207	363	1.0537	21.2674	1.82233369798975e-68	5.96968356122472e-62
6:32572311	363	1.0842	21.2531	2.10859517166482e-68	6.78408491020728e-62
6:32611572	363	1.04857	21.2483	2.21545622849901e-68	7.00284336619316e-62
6:32559019	363	1.03146	21.2331	2.58671832837583e-68	8.03539519484423e-62
6:32608251	363	1.05157	21.2207	2.93635971271775e-68	8.96692091491399e-62
6:32561186	363	1.0544	21.1603	5.44154044175299e-68	1.63401750616883e-61
6:32561895	363	1.048	21.1378	6.84525779830367e-68	2.02183666460175e-61
6:32609106	363	1.06294	21.0878	1.14065310058749e-67	3.31472871149191e-61
6:32611971	363	1.06076	21.0393	1.8723876441228e-67	5.35477603846144e-61
6:32550819	363	1.02463	21.0267	2.12967267671369e-67	5.99541126050815e-61
6:32429327	363	1.02449	20.9844	3.27975527405009e-67	6.5406004992215e-61
6:32429643	363	1.02449	20.9844	3.27975527405009e-67	6.5406004992215e-61
6:32429758	363	1.02449	20.9844	3.27975527405009e-67	6.5406004992215e-61
6:32429825	363	1.02449	20.9844	3.27975527405009e-67	6.5406004992215e-61
6:32430326	363	1.02449	20.9844	3.27975527405009e-67	6.5406004992215e-61
6:32431124	363	1.02449	20.9844	3.27975527405009e-67	6.5406004992215e-61
6:32432077	363	1.02449	20.9844	3.27975527405009e-67	6.5406004992215e-61
6:32432181	363	1.02449	20.9844	3.27975527405009e-67	6.5406004992215e-61
6:32432835	363	1.02449	20.9844	3.27975527405009e-67	6.5406004992215e-61
6:32433167	363	1.02449	20.9844	3.27975527405009e-67	6.5406004992215e-61
6:32433192	363	1.02449	20.9844	3.27975527405009e-67	6.5406004992215e-61
6:32434240	363	1.02449	20.9844	3.27975527405009e-67	6.5406004992215e-61
6:32434349	363	1.02449	20.9844	3.27975527405009e-67	6.5406004992215e-61
6:32434361	363	1.02449	20.9844	3.27975527405009e-67	6.5406004992215e-61
6:32434850	363	1.02449	20.9844	3.27975527405009e-67	6.5406004992215e-61
6:32438298	363	1.02449	20.9844	3.27975527405009e-67	6.5406004992215e-61
6:32438542	363	1.02449	20.9844	3.27975527405009e-67	6.5406004992215e-61
6:32438648	363	1.02449	20.9844	3.27975527405009e-67	6.5406004992215e-61
6:32438867	363	1.02449	20.9844	3.27975527405009e-67	6.5406004992215e-61
6:32439029	363	1.02459	20.9816	3.37609359098192e-67	6.5406004992215e-61
6:32439108	363	1.02459	20.9816	3.37609359098192e-67	6.5406004992215e-61
6:32439393	363	1.02454	20.9831	3.32506551801484e-67	6.5406004992215e-61
6:32439828	363	1.02449	20.9844	3.27975527405009e-67	6.5406004992215e-61
6:32441008	363	1.02449	20.9844	3.27975527405009e-67	6.5406004992215e-61
6:32441150	363	1.02687	21.0082	2.57183611707835e-67	6.5406004992215e-61
6:32441276	363	1.02496	20.9857	3.23876461616962e-67	6.5406004992215e-61
6:32445600	363	1.02449	20.9844	3.27975527405009e-67	6.5406004992215e-61
6:32451693	363	1.02449	20.9842	3.28705950868355e-67	6.5406004992215e-61
6:32452506	363	1.02449	20.9844	3.27975527405009e-67	6.5406004992215e-61
6:32439490	363	1.02484	20.9713	3.75235125150257e-67	7.19219950542654e-61
6:32613600	363	1.0641	20.9361	5.37458019059138e-67	1.01931176295698e-60
6:32553816	363	1.02315	20.9035	7.49580371284936e-67	1.40680229026004e-60
6:32553125	363	1.02353	20.8833	9.22334150609849e-67	1.71317863316085e-60
6:32611964	363	1.07755	20.8493	1.30425427444235e-66	2.37363079805747e-60
6:32612460	363	1.06313	20.8501	1.29456653928028e-66	2.37363079805747e-60
6:32450580	363	1.03357	20.8415	1.41306562348516e-66	2.54594152981756e-60
6:32612326	363	1.03099	20.7799	2.65191888973095e-66	4.73069509149663e-60
6:32613618	363	1.02479	20.755	3.42182378025152e-66	6.04426591395673e-60
6:32549625	363	1.24313	20.6786	7.4671252295098e-66	1.30617781872682e-59
6:32606052	363	1.03295	20.6096	1.51142876395543e-65	2.61842680331727e-59
6:32433067	363	1.19777	20.5934	1.78405817748465e-65	3.06129940880643e-59
6:32570401	363	1.07392	20.5756	2.13979412491494e-65	3.63707469035011e-59
6:32612279	363	1.04009	20.5274	3.5009659685785e-65	5.89508682250225e-59
6:32542282	363	1.5429	20.5001	4.63138024972849e-65	7.72632154318479e-59
6:32429245	363	1.00514	20.4088	1.176807870019e-64	1.94520402892778e-58
6:32610994	363	1.0505	20.3952	1.35303883239511e-64	2.21617305446251e-58
6:32521022	363	1.05488	20.3284	2.67791559539655e-64	4.3467033305945e-58
6:32511650	363	0.987001	20.3074	3.31996631710304e-64	5.34074385091009e-58
6:32509357	363	0.987825	20.283	4.26037363955627e-64	6.79290185132135e-58
6:32565056	363	1.03062	20.2675	4.9925203434592e-64	7.89043753562772e-58
6:32549531	363	1.28961	20.2252	7.68771439292849e-64	1.20444089890914e-57
6:32570880	363	1.06306	20.1106	2.48269620189796e-63	3.85613016155396e-57
6:32428062	363	1.02687	20.0901	3.06044969567235e-63	4.59504843619859e-57
6:32428079	363	1.02687	20.0901	3.06044969567235e-63	4.59504843619859e-57
6:32428115	363	1.02687	20.0901	3.06044969567235e-63	4.59504843619859e-57
6:32428715	363	1.02687	20.0901	3.06044969567235e-63	4.59504843619859e-57
6:32565164	363	1.01804	20.0877	3.13686527817806e-63	4.6708572104732e-57
6:32514041	363	0.98236	20.0824	3.30968804586684e-63	4.88779885045817e-57
6:32572048	363	1.06036	20.0421	4.99834868739743e-63	7.32162585797908e-57
6:32569691	363	1.06024	20.0395	5.13415095178527e-63	7.34148950959984e-57
6:32570184	363	1.06034	20.041	5.05441985761438e-63	7.34148950959984e-57
6:32570400	363	1.06025	20.0399	5.11042216341572e-63	7.34148950959984e-57
6:32549935	363	0.994543	20.0243	5.99525493820079e-63	8.50530767793735e-57
6:32605078	363	1.24109	20.0015	7.57264848727819e-63	1.06591831009816e-56
6:32607660	363	0.994097	19.9827	9.17204895575118e-63	1.28104016932645e-56
6:32509778	363	0.994712	19.9673	1.07365725283036e-62	1.47665982998721e-56
6:32574603	363	1.26138	19.9675	1.07205406940878e-62	1.47665982998721e-56
6:32605295	363	0.992975	19.9185	1.76823987289522e-62	2.41353356257076e-56
6:32571897	363	1.05644	19.9089	1.9501279997716e-62	2.64178561587104e-56
6:32510482	363	1.1729	19.8461	3.70629923249773e-62	4.98335441916391e-56
6:32603798	363	1.19499	19.8418	3.87236290022024e-62	5.16806986871874e-56
6:32560477	363	1.23687	19.836	4.10799915114102e-62	5.44223800779267e-56
6:32560483	363	1.23681	19.8352	4.1440526948932e-62	5.44992839502154e-56
6:32520272	363	1.01193	19.8171	4.98491787853598e-62	6.50826182284525e-56
6:32574868	363	1.28443	19.8049	5.64675316160681e-62	7.31930926083771e-56
6:32600101	363	1.23479	19.8024	5.79129084105391e-62	7.4530396983496e-56
6:32556635	363	1.03803	19.8013	5.85714992221596e-62	7.48433678872718e-56
6:32560631	363	1.23383	19.7806	7.23562254622134e-62	8.30352208653833e-56
6:32560695	363	1.23383	19.7806	7.23562254622134e-62	8.30352208653833e-56
6:32560749	363	1.2341	19.7811	7.19666837560399e-62	8.30352208653833e-56
6:32560839	363	1.23383	19.7806	7.23562254622134e-62	8.30352208653833e-56
6:32561334	363	1.23383	19.7806	7.23562254622134e-62	8.30352208653833e-56
6:32561465	363	1.23383	19.7806	7.23562254622134e-62	8.30352208653833e-56
6:32561466	363	1.23383	19.7806	7.23562254622134e-62	8.30352208653833e-56
6:32561565	363	1.23383	19.7806	7.23562254622134e-62	8.30352208653833e-56
6:32561638	363	1.23383	19.7806	7.23562254622134e-62	8.30352208653833e-56
6:32561681	363	1.23383	19.7806	7.23562254622134e-62	8.30352208653833e-56
6:32570311	363	1.23383	19.7806	7.23562254622134e-62	8.30352208653833e-56
6:32577973	363	1.23383	19.7806	7.23562254622134e-62	8.30352208653833e-56
6:32582650	363	1.23383	19.7806	7.23562254622134e-62	8.30352208653833e-56
6:32583099	363	1.23383	19.7806	7.23562254622134e-62	8.30352208653833e-56
6:32583357	363	1.23383	19.7806	7.23562254622134e-62	8.30352208653833e-56
6:32591588	363	1.23416	19.7866	6.80902044813957e-62	8.30352208653833e-56
6:32560025	363	1.23378	19.7775	7.47204091185515e-62	8.46697370534786e-56
6:32568146	363	1.23382	19.7776	7.4599409311984e-62	8.46697370534786e-56
6:32571122	363	1.23387	19.7754	7.63417589384612e-62	8.5966307628631e-56
6:32545788	363	1.14727	19.7703	8.04423894388866e-62	9.00212793092445e-56
6:32561935	363	1.21507	19.7684	8.1952907508866e-62	9.11455449088497e-56
6:32571961	363	1.23509	19.7674	8.28418805489021e-62	9.15689931369111e-56
6:32605609	363	1.1755	19.7455	1.0356139322668e-61	1.13773241217932e-55
6:32513127	363	1.0241	19.7402	1.09366682598538e-61	1.19422783356379e-55
6:32517646	363	1.02134	19.6868	1.88815114769557e-61	2.0493435211267e-55
6:32566398	363	1.23092	19.6357	3.1825424407443e-61	3.43355356504528e-55
6:32520035	363	1.12629	19.6268	3.48506375796588e-61	3.73755455278779e-55
6:32545385	363	1.02411	19.6083	4.2097771413804e-61	4.48805835637999e-55
6:32565169	363	1.02549	19.5896	5.0959617079896e-61	5.40086508747675e-55
6:32559825	363	1.21617	19.5672	6.40724656829585e-61	6.75089605309776e-55
6:32550126	363	1.13002	19.5544	7.30238934970013e-61	7.64931652743894e-55
6:32578772	363	1.2674	19.5409	8.38014782122932e-61	8.62779316098639e-55
6:32580617	363	1.2674	19.5409	8.38014782122932e-61	8.62779316098639e-55
6:32582189	363	1.2674	19.5409	8.38014782122932e-61	8.62779316098639e-55
6:32512533	363	1.21366	19.5141	1.10179219711766e-60	1.12790655024423e-54
6:32560209	363	1.2239	19.507	1.18455185396023e-60	1.20577674777286e-54
6:32503488	363	0.983878	19.477	1.60954162056863e-60	1.6291771241027e-54
6:32607659	363	0.991052	19.407	3.28881771881198e-60	3.31034202025102e-54
6:32560385	363	1.22319	19.3789	4.38140226971728e-60	4.38557677243538e-54
6:32608077	363	1.15978	19.2773	1.23664650474996e-59	1.23098594326275e-53
6:32549540	363	1.14217	19.2619	1.44783281332765e-59	1.43328686662892e-53
6:32610401	363	1.15216	19.2598	1.47927610632667e-59	1.45641199448653e-53
6:32609545	363	1.151	19.2492	1.64779749615255e-59	1.61351166618505e-53
6:32607853	363	1.15835	19.246	1.7016963479326e-59	1.65728207325156e-53
6:32581922	363	1.04831	19.1959	2.83981295657151e-59	2.75082451669314e-53
6:32609453	363	0.97414	19.1866	3.12029348636658e-59	3.00635271592993e-53
6:32612251	363	1.02301	19.1291	5.61365224312333e-59	5.37989438894625e-53
6:32550550	363	0.960562	19.0979	7.71943753145195e-59	7.32011915367366e-53
6:32561885	363	1.03512	19.0981	7.69903538417727e-59	7.32011915367366e-53
6:32608478	363	1.14672	19.0478	1.2868769726331e-58	1.21391913337573e-52
6:32396930	363	1.10876	18.9347	4.07734955823462e-58	3.77598092100021e-52
6:32402778	363	1.10876	18.9347	4.07734955823462e-58	3.77598092100021e-52
6:32405821	363	1.10876	18.9347	4.07734955823462e-58	3.77598092100021e-52
6:32573415	363	1.24794	18.9345	4.0867522310412e-58	3.77598092100021e-52
6:32546833	363	1.11253	18.91	5.24920957340483e-58	4.82529572783014e-52
6:32592898	363	1.07571	18.8833	6.88582760707394e-58	6.29761364826357e-52
6:32611068	363	0.995284	18.8698	7.90787450668909e-58	7.19582632162593e-52
6:32608998	363	1.13749	18.847	9.97273806792217e-58	9.02916169248563e-52
6:32589771	363	1.02072	18.8328	1.15319176845798e-57	1.03886145355363e-51
6:32584952	363	0.988813	18.8101	1.45330082095296e-57	1.30270342717575e-51
6:32501273	363	0.989391	18.772	2.14274632374703e-57	1.911197125094e-51
6:32573562	363	1.24497	18.7471	2.76167538082603e-57	2.45110933929309e-51
6:32546879	363	1.04469	18.7152	3.82301331677046e-57	3.3764609990319e-51
6:32612843	363	1.09691	18.6764	5.6755814160345e-57	4.98818544926371e-51
6:32559191	363	1.21292	18.5989	1.24893626634937e-56	1.09234330345906e-50
6:32587090	363	0.927412	18.5849	1.4410231810713e-56	1.25425752690043e-50
6:32564681	363	0.946849	18.3692	1.29380951434063e-55	1.11534737278959e-49
6:32564699	363	0.946901	18.3697	1.28841920297768e-55	1.11534737278959e-49
6:32567256	363	1.16642	18.3495	1.58135962169435e-55	1.3567425480005e-49
6:32576145	363	0.983504	18.3345	1.84155883711207e-55	1.5724948721362e-49
6:32387809	363	1.09733	18.3248	2.0334462497812e-55	1.72815594807761e-49
6:32565213	363	0.942537	18.3233	2.06410353503112e-55	1.74597478902281e-49
6:32564784	363	0.94238	18.3189	2.15930938983331e-55	1.80951633362955e-49
6:32564813	363	0.942385	18.319	2.15625816925495e-55	1.80951633362955e-49
6:32611474	363	1.01839	18.2364	4.99359497829712e-55	4.16529397051972e-49
6:32554404	363	1.2345	18.2233	5.70833445391618e-55	4.73953539660718e-49
6:32548977	363	1.22779	18.2141	6.26650047952326e-55	5.17910454654324e-49
12:69737879	476	0.542084	18.5599	1.85933511058545e-56	6.00330499661388e-49
12:69740869	476	0.542084	18.56	1.856141735064e-56	6.00330499661388e-49
12:69746671	476	0.542084	18.56	1.856141735064e-56	6.00330499661388e-49
12:69747834	476	0.542084	18.56	1.856141735064e-56	6.00330499661388e-49
6:32565004	363	0.93541	18.1933	7.74388256646401e-55	6.37089925946882e-49
6:32594441	363	0.938259	18.0707	2.68815565344506e-54	2.20149561961217e-48
6:32612111	363	1.09406	17.9962	5.7299684257023e-54	4.67138916837747e-48
12:69774563	476	0.545795	18.3096	2.37338230503907e-55	5.10868563341072e-48
12:69774877	476	0.547697	18.3267	1.99471660210764e-55	5.10868563341072e-48
6:32544589	363	1.82022	17.983	6.55295799237577e-54	5.31827149064563e-48
6:32608269	363	1.09651	17.9575	8.48642531919757e-54	6.85655596142514e-48
6:32567897	363	0.960616	17.8606	2.26850796802522e-53	1.82464501500472e-47
6:32575918	363	0.957389	17.7618	6.17552671922671e-53	4.90155908499187e-47
6:32576009	363	0.957389	17.7618	6.17552671922671e-53	4.90155908499187e-47
6:32576019	363	0.957389	17.7618	6.17552671922671e-53	4.90155908499187e-47
6:32605501	363	0.918754	17.757	6.47893572536236e-53	5.11982266685142e-47
6:32546934	363	1.23973	17.6933	1.23601869278037e-52	9.72468741948815e-47
6:32573877	363	0.963035	17.6645	1.65391583009581e-52	1.29560215644395e-46
6:32546696	363	0.984291	17.4743	1.13309631055225e-51	8.8377342821067e-46
6:32609647	363	1.10107	17.45	1.44930913456008e-51	1.125535348006e-45
6:32560771	363	1.12124	17.3649	3.42361765280522e-51	2.64737479799312e-45
12:69751986	476	0.523304	17.4669	1.22104191522591e-51	1.75218836478298e-44
12:69752200	476	0.523304	17.4669	1.22104191522591e-51	1.75218836478298e-44
12:69752436	476	0.523304	17.4669	1.22104191522591e-51	1.75218836478298e-44
12:69752775	476	0.521749	17.4393	1.61480172893463e-51	2.08550835891043e-44
6:32587350	363	1.12617	17.1098	4.48962721460552e-50	3.456849870497e-44
6:32543245	363	1.53737	17.0887	5.55076827605825e-50	4.25570317638225e-44
12:69753365	476	0.51914	17.2115	1.61077165809483e-50	7.42965550918279e-44
12:69753420	476	0.51914	17.2115	1.61077165809483e-50	7.42965550918279e-44
12:69753512	476	0.51914	17.2115	1.61077165809483e-50	7.42965550918279e-44
12:69753830	476	0.51914	17.2115	1.61077165809483e-50	7.42965550918279e-44
12:69753847	476	0.51914	17.2115	1.61077165809483e-50	7.42965550918279e-44
12:69754012	476	0.51914	17.2115	1.61077165809483e-50	7.42965550918279e-44
12:69755985	476	0.51972	17.2255	1.39740313858591e-50	7.42965550918279e-44
12:69758462	476	0.519706	17.2257	1.39575201620005e-50	7.42965550918279e-44
12:69761839	476	0.519706	17.2257	1.39575201620005e-50	7.42965550918279e-44
12:69762713	476	0.519706	17.2257	1.39575201620005e-50	7.42965550918279e-44
12:69764850	476	0.519706	17.2257	1.39575201620005e-50	7.42965550918279e-44
12:69765918	476	0.519706	17.2257	1.39575201620005e-50	7.42965550918279e-44
12:69766554	476	0.519797	17.2269	1.37905904040614e-50	7.42965550918279e-44
12:69771727	476	0.519706	17.2257	1.39575201620005e-50	7.42965550918279e-44
12:69776800	476	0.519706	17.2257	1.39575201620005e-50	7.42965550918279e-44
12:69777188	476	0.519706	17.2257	1.39575201620005e-50	7.42965550918279e-44
12:69784695	476	0.519706	17.2257	1.39575201620005e-50	7.42965550918279e-44
12:69786543	476	0.519706	17.2257	1.39575201620005e-50	7.42965550918279e-44
6:32512918	363	1.14844	17.0071	1.26292495340185e-49	9.64165606956959e-44
6:32544901	363	1.06763	16.99	1.50008663768551e-49	1.14039181283441e-43
6:32609358	363	1.01371	16.9751	1.74286809426882e-49	1.31939142372502e-43
6:32583529	363	1.09103	16.9735	1.77073784055434e-49	1.33488072317756e-43
12:69729434	476	0.515254	17.1448	3.15438381755755e-50	1.35795697615216e-43
12:69734641	476	0.515254	17.1448	3.15438381755755e-50	1.35795697615216e-43
12:69735492	476	0.513116	17.0987	5.01930485398942e-50	2.09109907174292e-43
12:69748397	476	0.516542	17.0937	5.27737592864597e-50	2.12990769530207e-43
6:32577472	363	1.07573	16.8752	4.75746953828232e-49	3.57150176215264e-43
6:32340236	363	0.906435	16.7839	1.19123703514468e-48	8.90568313184934e-43
6:32583820	363	1.40157	16.7584	1.53822711853779e-48	1.1452259805274e-42
12:69752509	476	0.51192	16.8923	4.00714609916355e-49	1.56824519737552e-42
6:32376176	363	0.927857	16.6973	2.8416475814202e-48	2.10692965932449e-42
6:32405026	363	1.06392	16.6452	4.78874657256763e-48	3.53604775860397e-42
6:32577222	363	1.05898	16.6327	5.42992542553675e-48	3.99313391349835e-42
6:32587966	363	1.39512	16.6175	6.32649169420773e-48	4.63355080602825e-42
6:32578590	363	1.05416	16.5688	1.03026650570552e-47	7.45480569207717e-42
6:32581973	363	1.05416	16.5688	1.03026650570552e-47	7.45480569207717e-42
6:32584693	363	1.05417	16.569	1.02771580399096e-47	7.45480569207717e-42
6:32577380	363	1.05411	16.5632	1.08960879996924e-47	7.85265807614634e-42
6:32340654	363	0.947893	16.5008	2.03487517516059e-47	1.15556470854236e-41
6:32341318	363	0.947893	16.5008	2.03487517516059e-47	1.15556470854236e-41
6:32341473	363	0.947893	16.5008	2.03487517516059e-47	1.15556470854236e-41
6:32341719	363	0.947893	16.5008	2.03487517516059e-47	1.15556470854236e-41
6:32342087	363	0.947893	16.5008	2.03487517516059e-47	1.15556470854236e-41
6:32342129	363	0.947893	16.5008	2.03487517516059e-47	1.15556470854236e-41
6:32342166	363	0.947893	16.5008	2.03487517516059e-47	1.15556470854236e-41
6:32342639	363	0.947893	16.5008	2.03487517516059e-47	1.15556470854236e-41
6:32343018	363	0.947893	16.5008	2.03487517516059e-47	1.15556470854236e-41
6:32343095	363	0.947893	16.5008	2.03487517516059e-47	1.15556470854236e-41
6:32343096	363	0.947893	16.5008	2.03487517516059e-47	1.15556470854236e-41
6:32343267	363	0.947893	16.5008	2.03487517516059e-47	1.15556470854236e-41
6:32343384	363	0.947893	16.5008	2.03487517516059e-47	1.15556470854236e-41
6:32343616	363	0.947893	16.5008	2.03487517516059e-47	1.15556470854236e-41
6:32343686	363	0.947893	16.5008	2.03487517516059e-47	1.15556470854236e-41
6:32343796	363	0.947893	16.5008	2.03487517516059e-47	1.15556470854236e-41
6:32343869	363	0.947893	16.5008	2.03487517516059e-47	1.15556470854236e-41
6:32343873	363	0.947893	16.5008	2.03487517516059e-47	1.15556470854236e-41
6:32343882	363	0.947893	16.5008	2.03487517516059e-47	1.15556470854236e-41
6:32343985	363	0.947893	16.5008	2.03487517516059e-47	1.15556470854236e-41
6:32344376	363	0.947893	16.5008	2.03487517516059e-47	1.15556470854236e-41
6:32344731	363	0.947893	16.5008	2.03487517516059e-47	1.15556470854236e-41
6:32344808	363	0.947893	16.5008	2.03487517516059e-47	1.15556470854236e-41
6:32344973	363	0.947893	16.5008	2.03487517516059e-47	1.15556470854236e-41
6:32345052	363	0.947893	16.5008	2.03487517516059e-47	1.15556470854236e-41
6:32345514	363	0.947893	16.5008	2.03487517516059e-47	1.15556470854236e-41
6:32345667	363	0.947893	16.5008	2.03487517516059e-47	1.15556470854236e-41
6:32346637	363	0.947893	16.5008	2.03487517516059e-47	1.15556470854236e-41
6:32346701	363	0.947893	16.5008	2.03487517516059e-47	1.15556470854236e-41
6:32346794	363	0.947893	16.5008	2.03487517516059e-47	1.15556470854236e-41
6:32347280	363	0.947893	16.5008	2.03487517516059e-47	1.15556470854236e-41
6:32347490	363	0.947893	16.5008	2.03487517516059e-47	1.15556470854236e-41
6:32347532	363	0.947893	16.5008	2.03487517516059e-47	1.15556470854236e-41
6:32347533	363	0.947893	16.5008	2.03487517516059e-47	1.15556470854236e-41
6:32347749	363	0.947893	16.5008	2.03487517516059e-47	1.15556470854236e-41
6:32347831	363	0.947893	16.5008	2.03487517516059e-47	1.15556470854236e-41
6:32347897	363	0.947893	16.5008	2.03487517516059e-47	1.15556470854236e-41
6:32348098	363	0.947893	16.5008	2.03487517516059e-47	1.15556470854236e-41
6:32348145	363	0.947893	16.5008	2.03487517516059e-47	1.15556470854236e-41
6:32348463	363	0.947893	16.5008	2.03487517516059e-47	1.15556470854236e-41
6:32348467	363	0.947893	16.5008	2.03487517516059e-47	1.15556470854236e-41
6:32348690	363	0.947893	16.5008	2.03487517516059e-47	1.15556470854236e-41
6:32349494	363	0.947893	16.5008	2.03487517516059e-47	1.15556470854236e-41
6:32349571	363	0.947893	16.5008	2.03487517516059e-47	1.15556470854236e-41
6:32349711	363	0.947893	16.5008	2.03487517516059e-47	1.15556470854236e-41
6:32349946	363	0.947893	16.5008	2.03487517516059e-47	1.15556470854236e-41
6:32350036	363	0.947893	16.5008	2.03487517516059e-47	1.15556470854236e-41
6:32350776	363	0.947893	16.5008	2.03487517516059e-47	1.15556470854236e-41
6:32351901	363	0.947893	16.5008	2.03487517516059e-47	1.15556470854236e-41
6:32351991	363	0.947893	16.5008	2.03487517516059e-47	1.15556470854236e-41
6:32357165	363	0.947893	16.5008	2.03487517516059e-47	1.15556470854236e-41
6:32358231	363	0.947893	16.5008	2.03487517516059e-47	1.15556470854236e-41
6:32359121	363	0.947893	16.5008	2.03487517516059e-47	1.15556470854236e-41
6:32360258	363	0.947919	16.5008	2.03602012868644e-47	1.15556470854236e-41
6:32363844	363	0.947893	16.5008	2.03487517516059e-47	1.15556470854236e-41
6:32364356	363	0.947893	16.5008	2.03487517516059e-47	1.15556470854236e-41
6:32367722	363	0.947893	16.5008	2.03487517516059e-47	1.15556470854236e-41
6:32367777	363	0.947893	16.5008	2.03487517516059e-47	1.15556470854236e-41
6:32368314	363	0.947893	16.5008	2.03487517516059e-47	1.15556470854236e-41
6:32370616	363	0.947893	16.5008	2.03487517516059e-47	1.15556470854236e-41
6:32370684	363	0.947893	16.5008	2.03487517516059e-47	1.15556470854236e-41
6:32371269	363	0.948074	16.501	2.03188656319859e-47	1.15556470854236e-41
6:32371619	363	0.947902	16.501	2.03042442846514e-47	1.15556470854236e-41
6:32374131	363	0.947893	16.5008	2.03487517516059e-47	1.15556470854236e-41
6:32374622	363	0.947893	16.5008	2.03487517516059e-47	1.15556470854236e-41
6:32376746	363	0.947893	16.5008	2.03487517516059e-47	1.15556470854236e-41
6:32378945	363	0.947893	16.5008	2.03487517516059e-47	1.15556470854236e-41
6:32379489	363	0.947876	16.5006	2.03955440964009e-47	1.15556470854236e-41
6:32371179	363	0.964446	16.4921	2.2203351487018e-47	1.25404738007626e-41
12:69754189	476	0.506945	16.6251	5.86188686304961e-48	1.48165279375742e-41
12:69755003	476	0.506676	16.6159	6.42453563121927e-48	1.48165279375742e-41
12:69757429	476	0.506676	16.6159	6.42453563121927e-48	1.48165279375742e-41
12:69758547	476	0.506676	16.6159	6.42453563121927e-48	1.48165279375742e-41
12:69758871	476	0.506676	16.6159	6.42453563121927e-48	1.48165279375742e-41
12:69764388	476	0.506676	16.6159	6.42453563121927e-48	1.48165279375742e-41
12:69765421	476	0.506676	16.6159	6.42453563121927e-48	1.48165279375742e-41
12:69771911	476	0.506676	16.6159	6.42453563121927e-48	1.48165279375742e-41
12:69774377	476	0.506688	16.6161	6.41373596974229e-48	1.48165279375742e-41
12:69774618	476	0.506676	16.6159	6.42453563121927e-48	1.48165279375742e-41
12:69775103	476	0.506676	16.6159	6.42453563121927e-48	1.48165279375742e-41
12:69775972	476	0.506676	16.6159	6.42453563121927e-48	1.48165279375742e-41
12:69776461	476	0.506676	16.6159	6.42453563121927e-48	1.48165279375742e-41
12:69776886	476	0.506676	16.6159	6.42453563121927e-48	1.48165279375742e-41
12:69778914	476	0.506676	16.6159	6.42453563121927e-48	1.48165279375742e-41
12:69779789	476	0.506676	16.6159	6.42453563121927e-48	1.48165279375742e-41
12:69780907	476	0.506676	16.6159	6.42453563121927e-48	1.48165279375742e-41
12:69781528	476	0.506676	16.6159	6.42453563121927e-48	1.48165279375742e-41
12:69782044	476	0.506676	16.6159	6.42453563121927e-48	1.48165279375742e-41
12:69782857	476	0.506676	16.6159	6.42453563121927e-48	1.48165279375742e-41
12:69784774	476	0.506676	16.6159	6.42453563121927e-48	1.48165279375742e-41
12:69785712	476	0.506676	16.6159	6.42453563121927e-48	1.48165279375742e-41
12:69785748	476	0.506676	16.6159	6.42453563121927e-48	1.48165279375742e-41
6:32381374	363	1.00047	16.438	3.81719469731668e-47	2.14252241248471e-41
6:32381443	363	1.00047	16.438	3.81719469731668e-47	2.14252241248471e-41
6:32552123	363	1.02553	16.4155	4.77645890600003e-47	2.6726141794484e-41
6:32375280	363	0.917682	16.3376	1.04127521977433e-46	5.79037402035713e-41
6:32375330	363	0.917682	16.3376	1.04127521977433e-46	5.79037402035713e-41
6:32584382	363	1.39974	16.334	1.07873861670668e-46	5.98024475938362e-41
12:69767949	476	0.504925	16.4543	3.24268384198951e-47	7.22053442846592e-41
12:69767963	476	0.504925	16.4543	3.24268384198951e-47	7.22053442846592e-41
6:32345891	363	1.00229	16.279	1.86779604523874e-46	1.01668765910795e-40
6:32349086	363	1.00229	16.279	1.86779604523874e-46	1.01668765910795e-40
6:32349772	363	1.00229	16.279	1.86779604523874e-46	1.01668765910795e-40
6:32371915	363	1.00229	16.279	1.86779604523874e-46	1.01668765910795e-40
6:32375973	363	1.00229	16.279	1.86779604523874e-46	1.01668765910795e-40
6:32376348	363	1.00229	16.279	1.86779604523874e-46	1.01668765910795e-40
6:32384801	363	1.05581	16.2426	2.68577283275553e-46	1.45752927691811e-40
6:32435338	363	0.849167	16.1861	4.72140431008524e-46	2.55454203199556e-40
6:32559213	363	1.13916	16.1553	6.41879838570552e-46	3.4625285429645e-40
6:32612104	363	1.17879	16.09	1.22897040053158e-45	6.60971464236941e-40
6:32454755	363	2.14892	16.0142	2.61462404400803e-45	1.40202599983629e-39
6:32375695	363	0.901107	16	3.01192660436235e-45	1.61027695607677e-39
6:32576064	363	0.878226	15.9607	4.44834062406653e-45	2.37119586612131e-39
12:69732105	476	0.497667	16.0809	1.34635148642226e-45	2.94712917450324e-39
6:32576592	363	0.865138	15.9015	8.00721742852276e-45	4.25567072248698e-39
6:32576626	363	0.862132	15.8758	1.03408716298327e-44	5.47979515545414e-39
6:32577497	363	0.86176	15.8724	1.06906868396751e-44	5.64855449834168e-39
6:32619099	363	0.973717	15.8606	1.20213066854113e-44	6.33303174699001e-39
6:32575432	363	1.38012	15.8398	1.47698954023329e-44	7.75835046496042e-39
6:32603825	363	0.847367	15.8279	1.66225675763922e-44	8.7061422502615e-39
6:32598090	363	1.39204	15.7899	2.42469684711818e-44	1.26626454490016e-38
6:32350384	363	0.918348	15.7768	2.76026178963605e-44	1.4364531511553e-38
6:32367847	363	0.918331	15.7766	2.76652657857036e-44	1.4364531511553e-38
6:32368087	363	0.91829	15.7757	2.79113296295104e-44	1.44506497883429e-38
6:32375352	363	0.891254	15.6622	8.58242518148702e-44	4.39292164371105e-38
6:32375371	363	0.891254	15.6622	8.58242518148702e-44	4.39292164371105e-38
6:32375374	363	0.891254	15.6622	8.58242518148702e-44	4.39292164371105e-38
6:32375424	363	0.891254	15.6622	8.58242518148702e-44	4.39292164371105e-38
12:69737879	306	-0.49455	-15.7463	3.73433625886072e-44	7.66098874975545e-38
12:69740869	306	-0.494546	-15.7462	3.73708215079883e-44	7.66098874975545e-38
12:69746671	306	-0.494546	-15.7462	3.73708215079883e-44	7.66098874975545e-38
12:69747834	306	-0.494546	-15.7462	3.73708215079883e-44	7.66098874975545e-38
6:32541114	363	1.65473	15.4971	4.38654002110983e-43	2.23889375471215e-37
12:69737879	105	-0.771564	-15.6109	1.42508705464997e-43	2.74797336115192e-37
12:69740869	105	-0.771559	-15.6109	1.42558984120867e-43	2.74797336115192e-37
12:69746671	105	-0.771559	-15.6109	1.42558984120867e-43	2.74797336115192e-37
12:69747834	105	-0.771559	-15.6109	1.42558984120867e-43	2.74797336115192e-37
6:32608886	363	1.17844	15.4311	8.40522604870953e-43	4.27791577693522e-37
12:69774877	306	-0.498131	-15.4974	4.3728388261e-43	8.30514629369709e-37
6:32446051	363	0.837033	15.222	6.57244603991383e-42	3.33568299064883e-36
12:69774563	306	-0.493698	-15.3525	1.82325674916468e-42	3.41264779023542e-36
12:69735492	105	-0.751526	-15.1783	1.00961758583705e-41	1.86273723431517e-35
6:32561880	363	1.00599	14.988	6.5101254866789e-41	3.29477268012125e-35
12:69729434	105	-0.750396	-15.0825	2.58175858906909e-41	4.63101154026359e-35
12:69734641	105	-0.750396	-15.0825	2.58175858906909e-41	4.63101154026359e-35
6:32571562	363	0.958679	14.7501	6.62244483681488e-40	3.34222918744031e-34
6:32379295	363	0.957244	14.6695	1.45035571764892e-39	7.29923925090456e-34
6:32561942	363	1.42752	14.5805	3.43837582821614e-39	1.72561930510709e-33
12:69729434	306	-0.46914	-14.6389	1.95147441259007e-39	3.40583708984867e-33
12:69734641	306	-0.46914	-14.6389	1.95147441259007e-39	3.40583708984867e-33
12:69774877	105	-0.752298	-14.6156	2.44674106005244e-39	4.21327179380323e-33
6:32589305	363	0.799475	14.4752	9.52873756222946e-39	4.76890816581451e-33
12:69774563	105	-0.74893	-14.5819	3.39101251226155e-39	5.76246803226741e-33
12:69735492	306	-0.466181	-14.5562	4.35372061348089e-39	7.30234857624352e-33
6:32620720	363	0.808746	14.3829	2.32634612876191e-38	1.1610561538455e-32
6:32609286	363	0.977745	14.3296	3.88815492677609e-38	1.93517874417027e-32
12:69754189	105	-0.728997	-14.3888	2.19657315533113e-38	2.89869511473573e-32
12:69755003	105	-0.728775	-14.3866	2.24444935112852e-38	2.89869511473573e-32
12:69757429	105	-0.728775	-14.3866	2.24444935112852e-38	2.89869511473573e-32
12:69758547	105	-0.728775	-14.3866	2.24444935112852e-38	2.89869511473573e-32
12:69758871	105	-0.728775	-14.3866	2.24444935112852e-38	2.89869511473573e-32
12:69764388	105	-0.728775	-14.3866	2.24444935112852e-38	2.89869511473573e-32
12:69765421	105	-0.728775	-14.3866	2.24444935112852e-38	2.89869511473573e-32
12:69771911	105	-0.728775	-14.3866	2.24444935112852e-38	2.89869511473573e-32
12:69774377	105	-0.728798	-14.3868	2.23857341769162e-38	2.89869511473573e-32
12:69774618	105	-0.728775	-14.3866	2.24444935112852e-38	2.89869511473573e-32
12:69775103	105	-0.728775	-14.3866	2.24444935112852e-38	2.89869511473573e-32
12:69775972	105	-0.728775	-14.3866	2.24444935112852e-38	2.89869511473573e-32
12:69776461	105	-0.728775	-14.3866	2.24444935112852e-38	2.89869511473573e-32
12:69776886	105	-0.728775	-14.3866	2.24444935112852e-38	2.89869511473573e-32
12:69778914	105	-0.728775	-14.3866	2.24444935112852e-38	2.89869511473573e-32
12:69779789	105	-0.728775	-14.3866	2.24444935112852e-38	2.89869511473573e-32
12:69780907	105	-0.728775	-14.3866	2.24444935112852e-38	2.89869511473573e-32
12:69781528	105	-0.728775	-14.3866	2.24444935112852e-38	2.89869511473573e-32
12:69782044	105	-0.728775	-14.3866	2.24444935112852e-38	2.89869511473573e-32
12:69782857	105	-0.728775	-14.3866	2.24444935112852e-38	2.89869511473573e-32
12:69784774	105	-0.728775	-14.3866	2.24444935112852e-38	2.89869511473573e-32
12:69785712	105	-0.728775	-14.3866	2.24444935112852e-38	2.89869511473573e-32
12:69785748	105	-0.728775	-14.3866	2.24444935112852e-38	2.89869511473573e-32
12:69752509	105	-0.728053	-14.3556	3.02504339065318e-38	3.86814694436795e-32
12:69784986	476	0.463184	14.3374	3.60793836028395e-38	4.56826897315188e-32
12:69748397	105	-0.726917	-14.2797	6.2886506096062e-38	7.88520467869259e-32
12:69767949	105	-0.726461	-14.2664	7.15099143972576e-38	8.7956854185225e-32
12:69767963	105	-0.726461	-14.2664	7.15099143972576e-38	8.7956854185225e-32
6:32578052	363	0.787224	14.0606	5.15664981455231e-37	2.50426235057308e-31
6:32578481	363	0.787224	14.0606	5.15664981455231e-37	2.50426235057308e-31
6:32578958	363	0.787224	14.0606	5.15664981455231e-37	2.50426235057308e-31
6:32579708	363	0.787224	14.0606	5.15664981455231e-37	2.50426235057308e-31
6:32579743	363	0.787224	14.0606	5.15664981455231e-37	2.50426235057308e-31
6:32579775	363	0.787224	14.0606	5.15664981455231e-37	2.50426235057308e-31
6:32579868	363	0.787224	14.0606	5.15664981455231e-37	2.50426235057308e-31
6:32580136	363	0.787224	14.0606	5.15664981455231e-37	2.50426235057308e-31
6:32580331	363	0.787224	14.0606	5.15664981455231e-37	2.50426235057308e-31
12:69752775	105	-0.71798	-14.0541	5.48687068092507e-37	6.51586182512182e-31
12:69755985	105	-0.720032	-14.0456	5.95334627981041e-37	6.51586182512182e-31
12:69758462	105	-0.720029	-14.0462	5.92172881283685e-37	6.51586182512182e-31
12:69761839	105	-0.720029	-14.0462	5.92172881283685e-37	6.51586182512182e-31
12:69762713	105	-0.720029	-14.0462	5.92172881283685e-37	6.51586182512182e-31
12:69764850	105	-0.720029	-14.0462	5.92172881283685e-37	6.51586182512182e-31
12:69765918	105	-0.720029	-14.0462	5.92172881283685e-37	6.51586182512182e-31
12:69766554	105	-0.720174	-14.0475	5.84465285287859e-37	6.51586182512182e-31
12:69771727	105	-0.720029	-14.0462	5.92172881283685e-37	6.51586182512182e-31
12:69776800	105	-0.720029	-14.0462	5.92172881283685e-37	6.51586182512182e-31
12:69777188	105	-0.720029	-14.0462	5.92172881283685e-37	6.51586182512182e-31
12:69784695	105	-0.720029	-14.0462	5.92172881283685e-37	6.51586182512182e-31
12:69786543	105	-0.720029	-14.0462	5.92172881283685e-37	6.51586182512182e-31
12:69732105	105	-0.718202	-14.0361	6.52068858455156e-37	7.03991913723353e-31
12:69753365	105	-0.719081	-14.0315	6.81373053828463e-37	7.03991913723353e-31
12:69753420	105	-0.719081	-14.0315	6.81373053828463e-37	7.03991913723353e-31
12:69753512	105	-0.719081	-14.0315	6.81373053828463e-37	7.03991913723353e-31
12:69753830	105	-0.719081	-14.0315	6.81373053828463e-37	7.03991913723353e-31
12:69753847	105	-0.719081	-14.0315	6.81373053828463e-37	7.03991913723353e-31
12:69754012	105	-0.719081	-14.0315	6.81373053828463e-37	7.03991913723353e-31
12:69751986	105	-0.716963	-13.9823	1.09104329204432e-36	1.10084137223342e-30
12:69752200	105	-0.716963	-13.9823	1.09104329204432e-36	1.10084137223342e-30
12:69752436	105	-0.716963	-13.9823	1.09104329204432e-36	1.10084137223342e-30
6:32656038	363	0.829414	13.8978	2.44504728229868e-36	1.18421461403945e-30
12:69754189	306	-0.455059	-13.9468	1.53110358827351e-36	1.5328780067731e-30
12:69755003	306	-0.454516	-13.9265	1.8587057113662e-36	1.59042520164473e-30
12:69757429	306	-0.454516	-13.9265	1.8587057113662e-36	1.59042520164473e-30
12:69758547	306	-0.454516	-13.9265	1.8587057113662e-36	1.59042520164473e-30
12:69758871	306	-0.454516	-13.9265	1.8587057113662e-36	1.59042520164473e-30
12:69764388	306	-0.454516	-13.9265	1.8587057113662e-36	1.59042520164473e-30
12:69765421	306	-0.454516	-13.9265	1.8587057113662e-36	1.59042520164473e-30
12:69771911	306	-0.454516	-13.9265	1.8587057113662e-36	1.59042520164473e-30
12:69774377	306	-0.454523	-13.9265	1.85950549904069e-36	1.59042520164473e-30
12:69774618	306	-0.454516	-13.9265	1.8587057113662e-36	1.59042520164473e-30
12:69775103	306	-0.454516	-13.9265	1.8587057113662e-36	1.59042520164473e-30
12:69775972	306	-0.454516	-13.9265	1.8587057113662e-36	1.59042520164473e-30
12:69776461	306	-0.454516	-13.9265	1.8587057113662e-36	1.59042520164473e-30
12:69776886	306	-0.454516	-13.9265	1.8587057113662e-36	1.59042520164473e-30
12:69778914	306	-0.454516	-13.9265	1.8587057113662e-36	1.59042520164473e-30
12:69779789	306	-0.454516	-13.9265	1.8587057113662e-36	1.59042520164473e-30
12:69780907	306	-0.454516	-13.9265	1.8587057113662e-36	1.59042520164473e-30
12:69781528	306	-0.454516	-13.9265	1.8587057113662e-36	1.59042520164473e-30
12:69782044	306	-0.454516	-13.9265	1.8587057113662e-36	1.59042520164473e-30
12:69782857	306	-0.454516	-13.9265	1.8587057113662e-36	1.59042520164473e-30
12:69784774	306	-0.454516	-13.9265	1.8587057113662e-36	1.59042520164473e-30
12:69785712	306	-0.454516	-13.9265	1.8587057113662e-36	1.59042520164473e-30
12:69785748	306	-0.454516	-13.9265	1.8587057113662e-36	1.59042520164473e-30
12:69753365	306	-0.455811	-13.9145	2.08444563644893e-36	1.65283119631201e-30
12:69753420	306	-0.455811	-13.9145	2.08444563644893e-36	1.65283119631201e-30
12:69753512	306	-0.455811	-13.9145	2.08444563644893e-36	1.65283119631201e-30
12:69753830	306	-0.455811	-13.9145	2.08444563644893e-36	1.65283119631201e-30
12:69753847	306	-0.455811	-13.9145	2.08444563644893e-36	1.65283119631201e-30
12:69754012	306	-0.455811	-13.9145	2.08444563644893e-36	1.65283119631201e-30
12:69755985	306	-0.456016	-13.9107	2.16283045754517e-36	1.65283119631201e-30
12:69758462	306	-0.456004	-13.9107	2.1616679441789e-36	1.65283119631201e-30
12:69761839	306	-0.456004	-13.9107	2.1616679441789e-36	1.65283119631201e-30
12:69762713	306	-0.456004	-13.9107	2.1616679441789e-36	1.65283119631201e-30
12:69764850	306	-0.456004	-13.9107	2.1616679441789e-36	1.65283119631201e-30
12:69765918	306	-0.456004	-13.9107	2.1616679441789e-36	1.65283119631201e-30
12:69766554	306	-0.456067	-13.9108	2.15941853049032e-36	1.65283119631201e-30
12:69771727	306	-0.456004	-13.9107	2.1616679441789e-36	1.65283119631201e-30
12:69776800	306	-0.456004	-13.9107	2.1616679441789e-36	1.65283119631201e-30
12:69777188	306	-0.456004	-13.9107	2.1616679441789e-36	1.65283119631201e-30
12:69784695	306	-0.456004	-13.9107	2.1616679441789e-36	1.65283119631201e-30
12:69786543	306	-0.456004	-13.9107	2.1616679441789e-36	1.65283119631201e-30
12:69752775	306	-0.45439	-13.9044	2.29598663400681e-36	1.74426779875684e-30
12:69767949	306	-0.455093	-13.9027	2.33410511330699e-36	1.75260760657582e-30
12:69767963	306	-0.455093	-13.9027	2.33410511330699e-36	1.75260760657582e-30
12:69752509	306	-0.453621	-13.8773	2.97341516120866e-36	2.21974035469664e-30
12:69748397	306	-0.453708	-13.8408	4.20805879007043e-36	3.12338326843793e-30
12:69751986	306	-0.453628	-13.8285	4.73177034006986e-36	3.45257499172233e-30
12:69752200	306	-0.453628	-13.8285	4.73177034006986e-36	3.45257499172233e-30
12:69752436	306	-0.453628	-13.8285	4.73177034006986e-36	3.45257499172233e-30
6:32556499	363	0.98352	13.7636	8.77417875080851e-36	4.23822237748337e-30
12:69686132	476	0.449494	13.7007	1.59505957577178e-35	1.13812788221623e-29
12:69687051	476	0.449494	13.7007	1.59505957577178e-35	1.13812788221623e-29
12:69691308	476	0.448256	13.702	1.57592440769233e-35	1.13812788221623e-29
12:69692166	476	0.449494	13.7007	1.59505957577178e-35	1.13812788221623e-29
12:69681413	476	0.446927	13.6244	3.28716113606599e-35	2.31986457454838e-29
12:69683502	476	0.44693	13.6246	3.28110996930679e-35	2.31986457454838e-29
12:69713018	476	0.439329	13.5714	5.43140908944425e-35	3.81230308802815e-29
6:32648153	363	0.833612	13.5185	8.95060729225786e-35	4.31188326673005e-29
12:69677124	476	0.443447	13.5524	6.49831582188384e-35	4.53650940128858e-29
12:69624287	476	0.442739	13.5318	7.89716890786843e-35	5.25729595807605e-29
12:69627163	476	0.442742	13.5319	7.88775754366328e-35	5.25729595807605e-29
12:69630911	476	0.442742	13.5319	7.88775754366328e-35	5.25729595807605e-29
12:69638298	476	0.442742	13.5319	7.88775754366328e-35	5.25729595807605e-29
12:69639238	476	0.442742	13.5319	7.88775754366328e-35	5.25729595807605e-29
12:69643321	476	0.442742	13.5319	7.88775754366328e-35	5.25729595807605e-29
12:69653146	476	0.442742	13.5319	7.88775754366328e-35	5.25729595807605e-29
12:69661131	476	0.442742	13.5319	7.88775754366328e-35	5.25729595807605e-29
12:69667075	476	0.442742	13.5319	7.88775754366328e-35	5.25729595807605e-29
12:69675547	476	0.443963	13.5305	7.99066566752265e-35	5.2922588493729e-29
6:32578632	363	0.828885	13.4924	1.14466965782213e-34	5.499649313448e-29
12:69668934	476	0.442932	13.5211	8.73381532991329e-35	5.66953872119428e-29
12:69670096	476	0.442932	13.5211	8.73381532991329e-35	5.66953872119428e-29
12:69671441	476	0.442933	13.5211	8.73590842796652e-35	5.66953872119428e-29
12:69673556	476	0.442932	13.5211	8.73381532991329e-35	5.66953872119428e-29
6:32367697	363	1.98467	13.4767	1.32753454369088e-34	6.36127367123939e-29
6:32449138	363	0.752514	13.4416	1.84958671607376e-34	8.79268635923702e-29
6:32451570	363	0.752435	13.4418	1.84495241209354e-34	8.79268635923702e-29
6:32452626	363	0.752438	13.442	1.84166975718354e-34	8.79268635923702e-29
6:32450678	363	0.752426	13.4398	1.87962971739394e-34	8.91199225335372e-29
6:32449198	363	0.752999	13.4281	2.09952133008209e-34	9.92844901109934e-29
12:69712003	476	0.438347	13.4446	1.79643075556548e-34	1.16004066932952e-28
6:32449411	363	0.752689	13.4102	2.4857538390618e-34	1.1724136068443e-28
6:32448398	363	0.752465	13.4025	2.67285852882219e-34	1.25737057552399e-28
6:32448129	363	0.752296	13.3974	2.80386817667432e-34	1.31556545623353e-28
12:69713085	476	0.440108	13.4225	2.21219367508154e-34	1.42141147781066e-28
6:32428772	363	0.751697	13.3817	3.24875865818167e-34	1.47505728227948e-28
6:32442836	363	0.751697	13.3817	3.24875865818167e-34	1.47505728227948e-28
6:32443172	363	0.751697	13.3817	3.24875865818167e-34	1.47505728227948e-28
6:32443451	363	0.751697	13.3817	3.24875865818167e-34	1.47505728227948e-28
6:32444078	363	0.751695	13.3817	3.25022404245374e-34	1.47505728227948e-28
6:32444198	363	0.751697	13.3817	3.24875865818167e-34	1.47505728227948e-28
6:32444330	363	0.751697	13.3817	3.24875865818167e-34	1.47505728227948e-28
6:32445079	363	0.751699	13.3818	3.24750711734571e-34	1.47505728227948e-28
6:32445691	363	0.751697	13.3817	3.24875865818167e-34	1.47505728227948e-28
6:32446459	363	0.751697	13.3817	3.24875865818167e-34	1.47505728227948e-28
6:32446922	363	0.751703	13.3819	3.24421590480128e-34	1.47505728227948e-28
6:32447341	363	0.751697	13.3817	3.24875865818167e-34	1.47505728227948e-28
6:32447474	363	0.751787	13.3839	3.18382726726357e-34	1.47505728227948e-28
12:69711886	476	0.439629	13.4139	2.40050219325094e-34	1.50496921362749e-28
12:69715913	476	0.439629	13.4139	2.40050219325094e-34	1.50496921362749e-28
12:69720691	476	0.439629	13.4139	2.40050219325094e-34	1.50496921362749e-28
12:69721970	476	0.439629	13.4139	2.40050219325094e-34	1.50496921362749e-28
12:69722880	476	0.439629	13.4139	2.40050219325094e-34	1.50496921362749e-28
6:32621590	363	0.810074	13.3327	5.15133295712503e-34	2.33196830624284e-28
6:32399187	363	0.760924	13.313	6.19703588467728e-34	2.79831892455171e-28
6:32443876	363	0.764295	13.2977	7.15566185477765e-34	3.22311582467018e-28
12:69618417	476	0.436007	13.3233	5.62476380920681e-34	3.50934992066258e-28
12:69669225	476	0.435514	13.3146	6.10165734331366e-34	3.75250473838232e-28
12:69669851	476	0.435514	13.3146	6.10165734331366e-34	3.75250473838232e-28
12:69670186	476	0.435514	13.3146	6.10165734331366e-34	3.75250473838232e-28
12:69712608	476	0.439411	13.2908	7.63543580793058e-34	4.67351998519588e-28
12:69688757	476	0.43853	13.2644	9.77972032513138e-34	5.82048843378136e-28
12:69692420	476	0.43853	13.2644	9.77972032513138e-34	5.82048843378136e-28
12:69696400	476	0.43853	13.2644	9.77972032513138e-34	5.82048843378136e-28
12:69699638	476	0.43853	13.2644	9.77972032513138e-34	5.82048843378136e-28
12:69700772	476	0.43853	13.2644	9.77972032513138e-34	5.82048843378136e-28
12:69705362	476	0.438435	13.2665	9.5862055236652e-34	5.82048843378136e-28
12:69636314	476	0.433741	13.2416	1.21028868341695e-33	7.13735974059168e-28
12:69646914	476	0.433741	13.2416	1.21028868341695e-33	7.13735974059168e-28
12:69619392	476	0.436341	13.235	1.28739283003458e-33	7.50182780063051e-28
12:69619851	476	0.436337	13.2348	1.28951778500108e-33	7.50182780063051e-28
12:69620539	476	0.436337	13.2348	1.28951778500108e-33	7.50182780063051e-28
6:32607577	363	1.10403	13.1958	1.85886535402782e-33	8.35198401828486e-28
12:69682327	476	0.433059	13.212	1.5967206677659e-33	9.24733972563375e-28
6:32620800	363	0.75357	13.1846	2.06434896618047e-33	9.25216044179564e-28
12:69712003	105	-0.682278	-13.2065	1.68212089651461e-33	9.69844074662561e-28
6:32414433	363	0.724514	13.1677	2.41673951958037e-33	1.0173541690469e-27
6:32414668	363	0.724528	13.168	2.41076135538076e-33	1.0173541690469e-27
6:32415386	363	0.724514	13.1677	2.41673951958037e-33	1.0173541690469e-27
6:32415422	363	0.724514	13.1677	2.41673951958037e-33	1.0173541690469e-27
6:32415457	363	0.724514	13.1677	2.41673951958037e-33	1.0173541690469e-27
6:32415464	363	0.724514	13.1677	2.41673951958037e-33	1.0173541690469e-27
6:32415540	363	0.724514	13.1677	2.41673951958037e-33	1.0173541690469e-27
6:32415585	363	0.724514	13.1677	2.41673951958037e-33	1.0173541690469e-27
6:32416469	363	0.724514	13.1677	2.41673951958037e-33	1.0173541690469e-27
6:32416826	363	0.724514	13.1677	2.41673951958037e-33	1.0173541690469e-27
6:32417704	363	0.724514	13.1677	2.41673951958037e-33	1.0173541690469e-27
6:32418561	363	0.724514	13.1677	2.41673951958037e-33	1.0173541690469e-27
6:32419022	363	0.724514	13.1677	2.41673951958037e-33	1.0173541690469e-27
6:32419291	363	0.724514	13.1677	2.41673951958037e-33	1.0173541690469e-27
6:32419547	363	0.724514	13.1677	2.41673951958037e-33	1.0173541690469e-27
6:32419908	363	0.724514	13.1677	2.41673951958037e-33	1.0173541690469e-27
6:32420372	363	0.724537	13.1681	2.4084813387499e-33	1.0173541690469e-27
6:32421154	363	0.724514	13.1677	2.41673951958037e-33	1.0173541690469e-27
6:32421735	363	0.724514	13.1677	2.41673951958037e-33	1.0173541690469e-27
6:32422259	363	0.724514	13.1677	2.41673951958037e-33	1.0173541690469e-27
6:32424176	363	0.724514	13.1677	2.41673951958037e-33	1.0173541690469e-27
6:32424265	363	0.724514	13.1677	2.41673951958037e-33	1.0173541690469e-27
6:32424296	363	0.724514	13.1677	2.41673951958037e-33	1.0173541690469e-27
6:32424370	363	0.724514	13.1677	2.41673951958037e-33	1.0173541690469e-27
6:32424616	363	0.724514	13.1677	2.41673951958037e-33	1.0173541690469e-27
6:32425049	363	0.724519	13.1677	2.41598221938939e-33	1.0173541690469e-27
6:32425605	363	0.726249	13.1595	2.61016812085034e-33	1.0860921607062e-27
6:32425742	363	0.726249	13.1595	2.61016812085034e-33	1.0860921607062e-27
6:32425914	363	0.726249	13.1595	2.61016812085034e-33	1.0860921607062e-27
6:32426540	363	0.726249	13.1595	2.61016812085034e-33	1.0860921607062e-27
6:32426602	363	0.726249	13.1595	2.61016812085034e-33	1.0860921607062e-27
6:32450089	363	0.743589	13.1532	2.76738306343728e-33	1.14885612353477e-27
6:32549356	363	0.748356	13.1259	3.56991163000724e-33	1.47861226033529e-27
6:32643108	363	0.788042	13.1127	4.03904658152202e-33	1.66908504853829e-27
6:32610997	363	1.01564	13.1041	4.37734663605892e-33	1.80474395752561e-27
12:69654187	476	0.429453	13.1063	4.28649864371708e-33	2.41746356588096e-27
12:69658330	476	0.429453	13.1063	4.28649864371708e-33	2.41746356588096e-27
12:69659299	476	0.429453	13.1063	4.28649864371708e-33	2.41746356588096e-27
12:69671791	476	0.429453	13.1063	4.28649864371708e-33	2.41746356588096e-27
12:69674187	476	0.429453	13.1063	4.28649864371708e-33	2.41746356588096e-27
6:32638315	363	0.712714	13.0676	6.14938255196402e-33	2.52955132068764e-27
12:69621264	476	0.429353	13.0903	4.97731061947191e-33	2.79485729499777e-27
6:32449160	363	0.737294	13.0489	7.31930705259013e-33	3.00394198320215e-27
6:32449188	363	0.737717	13.0397	7.97925921448654e-33	3.26735250355196e-27
6:32637887	363	0.728711	13.0323	8.54521050692451e-33	3.49116416065385e-27
12:69712608	105	-0.684235	-13.0649	6.30544151193184e-33	3.52530137898373e-27
6:32638490	363	0.716935	13.0129	1.02393477375971e-32	4.17384307896941e-27
12:69732105	306	-0.434822	-13.0308	8.66688944965931e-33	4.824674305943e-27
12:69668934	105	-0.679297	-13.0058	1.09383357973387e-32	5.99409508987219e-27
12:69670096	105	-0.679297	-13.0058	1.09383357973387e-32	5.99409508987219e-27
12:69671441	105	-0.679295	-13.0056	1.0953247524844e-32	5.99409508987219e-27
12:69673556	105	-0.679297	-13.0058	1.09383357973387e-32	5.99409508987219e-27
6:32373801	363	0.751359	12.9576	1.7111581370615e-32	6.95941147385049e-27
6:32590456	363	0.769677	12.9429	1.96179382621187e-32	7.96079586394891e-27
12:69619736	476	0.428445	12.9675	1.56165597186436e-32	8.51000371047665e-27
12:69675547	105	-0.677835	-12.933	2.15111563275227e-32	1.16729205215185e-26
12:69686132	105	-0.680038	-12.9241	2.33624361415894e-32	1.2519696873312e-26
12:69687051	105	-0.680038	-12.9241	2.33624361415894e-32	1.2519696873312e-26
12:69692166	105	-0.680038	-12.9241	2.33624361415894e-32	1.2519696873312e-26
12:69677124	105	-0.675558	-12.9134	2.57959484151864e-32	1.37666687596988e-26
12:69624287	105	-0.675043	-12.9094	2.67717385682183e-32	1.37762487442238e-26
12:69627163	105	-0.675043	-12.9094	2.67739204162631e-32	1.37762487442238e-26
12:69630911	105	-0.675043	-12.9094	2.67739204162631e-32	1.37762487442238e-26
12:69638298	105	-0.675043	-12.9094	2.67739204162631e-32	1.37762487442238e-26
12:69639238	105	-0.675043	-12.9094	2.67739204162631e-32	1.37762487442238e-26
12:69643321	105	-0.675043	-12.9094	2.67739204162631e-32	1.37762487442238e-26
12:69653146	105	-0.675043	-12.9094	2.67739204162631e-32	1.37762487442238e-26
12:69661131	105	-0.675043	-12.9094	2.67739204162631e-32	1.37762487442238e-26
12:69667075	105	-0.675043	-12.9094	2.67739204162631e-32	1.37762487442238e-26
12:69691308	105	-0.677253	-12.9009	2.89633694116726e-32	1.48436693564794e-26
12:69681413	105	-0.677785	-12.898	2.97567273669892e-32	1.51735805900106e-26
12:69683502	105	-0.677772	-12.8977	2.98420781331921e-32	1.51735805900106e-26
6:32572113	363	0.727103	12.8592	4.26322189699961e-32	1.72609232362981e-26
6:32615421	363	0.737812	12.8324	5.4595589353381e-32	2.20550879533244e-26
6:32609094	363	0.772851	12.8136	6.49408836687061e-32	2.61756072078664e-26
12:69615090	476	0.424192	12.8321	5.47392755152234e-32	2.77237257378562e-26
6:32637016	363	0.723501	12.7877	8.24995412215105e-32	3.31787189535522e-26
6:32637454	363	0.718981	12.7618	1.04853470943445e-31	4.20748488643359e-26
6:32637573	363	0.734443	12.6924	1.98765750442706e-31	7.95820520130844e-26
6:32626249	363	0.736797	12.688	2.06836003273656e-31	8.262960745858e-26
6:32376517	363	1.3041	12.6685	2.47671447431603e-31	9.87241951126617e-26
12:69618417	105	-0.663257	-12.6755	2.32179962207006e-31	1.17132523550991e-25
12:69619392	105	-0.666471	-12.6649	2.558272009405e-31	1.27674124552173e-25
12:69619851	105	-0.666468	-12.6649	2.56041241034714e-31	1.27674124552173e-25
12:69620539	105	-0.666468	-12.6649	2.56041241034714e-31	1.27674124552173e-25
6:32648490	363	0.741438	12.6377	3.28559664656224e-31	1.30677897617238e-25
6:32561140	363	1.48332	12.567	6.28576772770253e-31	2.49452907522413e-25
6:32346408	363	2.23604	12.5572	6.87580254523747e-31	2.7226893588555e-25
6:32657817	363	0.74049	12.5522	7.19980256636971e-31	2.8447351493129e-25
12:69615090	105	-0.658718	-12.5705	6.09092802670799e-31	3.02553965071278e-25
6:32608915	363	0.777895	12.5179	9.86045404684657e-31	3.88746782560485e-25
6:32409305	363	0.695514	12.5115	1.04535885087171e-30	4.07974672370641e-25
6:32409781	363	0.695507	12.5114	1.046138255136e-30	4.07974672370641e-25
6:32409787	363	0.695507	12.5114	1.046138255136e-30	4.07974672370641e-25
6:32410716	363	0.695507	12.5114	1.046138255136e-30	4.07974672370641e-25
6:32411523	363	0.695507	12.5114	1.046138255136e-30	4.07974672370641e-25
6:32370835	363	0.730952	12.4874	1.30311998165107e-30	5.0600233140958e-25
6:32373698	363	0.730952	12.4874	1.30311998165107e-30	5.0600233140958e-25
6:32367997	363	1.06534	12.482	1.36931520916327e-30	5.30562527328517e-25
12:69711886	105	-0.65826	-12.4828	1.35856289100911e-30	6.62104596575025e-25
12:69715913	105	-0.65826	-12.4828	1.35856289100911e-30	6.62104596575025e-25
12:69720691	105	-0.65826	-12.4828	1.35856289100911e-30	6.62104596575025e-25
12:69721970	105	-0.65826	-12.4828	1.35856289100911e-30	6.62104596575025e-25
12:69722880	105	-0.65826	-12.4828	1.35856289100911e-30	6.62104596575025e-25
12:69713085	105	-0.65856	-12.4797	1.39823906117775e-30	6.78879231697652e-25
12:69784986	306	-0.421032	-12.4254	2.29537029301709e-30	1.11028436576034e-24
6:32612397	363	0.718984	12.3722	3.72561485570053e-30	1.44044982183229e-24
12:69705362	105	-0.657676	-12.3821	3.40368143898644e-30	1.64023789553873e-24
12:69636314	105	-0.651062	-12.3709	3.77098105609522e-30	1.80377895520063e-24
12:69646914	105	-0.651062	-12.3709	3.77098105609522e-30	1.80377895520063e-24
12:69688757	105	-0.656858	-12.3555	4.33799637670265e-30	2.03727295655621e-24
12:69692420	105	-0.656858	-12.3555	4.33799637670265e-30	2.03727295655621e-24
12:69696400	105	-0.656858	-12.3555	4.33799637670265e-30	2.03727295655621e-24
12:69699638	105	-0.656858	-12.3555	4.33799637670265e-30	2.03727295655621e-24
12:69700772	105	-0.656858	-12.3555	4.33799637670265e-30	2.03727295655621e-24
12:69654187	105	-0.647488	-12.3234	5.80908281011705e-30	2.67942907280433e-24
12:69658330	105	-0.647488	-12.3234	5.80908281011705e-30	2.67942907280433e-24
12:69659299	105	-0.647488	-12.3234	5.80908281011705e-30	2.67942907280433e-24
12:69671791	105	-0.647488	-12.3234	5.80908281011705e-30	2.67942907280433e-24
12:69674187	105	-0.647488	-12.3234	5.80908281011705e-30	2.67942907280433e-24
12:69682327	105	-0.648453	-12.3032	6.97667972699697e-30	3.2065291758071e-24
6:32411833	363	0.685719	12.2543	1.08739575431912e-29	4.19524034580958e-24
6:32636780	363	0.71299	12.2415	1.22113670492334e-29	4.70115452630547e-24
6:32636844	363	0.712529	12.2306	1.34789409621084e-29	5.17808318028681e-24
6:32637095	363	0.714039	12.2301	1.35348852210291e-29	5.18717346300892e-24
6:32637593	363	0.714026	12.2299	1.35601840528452e-29	5.18717346300892e-24
12:69621264	105	-0.64453	-12.2362	1.28118342922631e-29	5.86752479761925e-24
6:32418416	363	0.700959	12.2134	1.57476102427901e-29	6.01116643826031e-24
12:69784986	105	-0.652793	-12.2293	1.36287585183922e-29	6.21960193735369e-24
6:32423355	363	0.699765	12.1676	2.38176236281841e-29	9.07242489540249e-24
6:32636930	363	0.711814	12.1655	2.42733768706877e-29	9.22652050813737e-24
12:69713018	105	-0.637772	-12.1005	4.36302624774694e-29	1.98409386754716e-23
12:69619736	105	-0.640643	-12.0612	6.21465250630525e-29	2.81620794337919e-23
12:69669225	105	-0.638141	-12.0352	7.85697465854142e-29	3.52334843285866e-23
12:69669851	105	-0.638141	-12.0352	7.85697465854142e-29	3.52334843285866e-23
12:69670186	105	-0.638141	-12.0352	7.85697465854142e-29	3.52334843285866e-23
6:32637469	363	0.704484	12.0147	9.44105646577052e-29	3.58107222110015e-23
6:32523396	363	1.93677	11.9928	1.14929099830608e-28	4.35019922481733e-23
12:69645235	476	0.411855	12.0006	1.0712264356721e-28	4.78714043438872e-23
6:32590899	363	0.689397	11.9648	1.47738471698042e-28	5.56867406977903e-23
6:32590953	363	0.689397	11.9648	1.47738471698042e-28	5.56867406977903e-23
6:32542591	363	2.116	11.9552	1.61053892794651e-28	6.05789591767254e-23
6:32587588	363	0.676051	11.9498	1.68957909031338e-28	6.3419583139666e-23
6:32554284	363	1.39252	11.921	2.1866148257485e-28	8.19055453383254e-23
12:69668934	306	-0.406715	-11.932	1.98185445511275e-28	8.74184922084184e-23
12:69670096	306	-0.406715	-11.932	1.98185445511275e-28	8.74184922084184e-23
12:69671441	306	-0.406715	-11.9319	1.98325337822187e-28	8.74184922084184e-23
12:69673556	306	-0.406715	-11.932	1.98185445511275e-28	8.74184922084184e-23
6:32561137	363	0.889561	11.9044	2.53686538914249e-28	9.48279756140844e-23
6:32648931	363	0.689614	11.8451	4.30665916121243e-28	1.60649532311467e-22
12:69675547	306	-0.405587	-11.8583	3.82802877553485e-28	1.68159184471408e-22
6:32677912	363	0.70639	11.7963	6.65615014283602e-28	2.47778627161153e-22
12:69619392	306	-0.402892	-11.7828	7.50604754894995e-28	3.26398076741788e-22
12:69619851	306	-0.402896	-11.7829	7.49600366882383e-28	3.26398076741788e-22
12:69620539	306	-0.402896	-11.7829	7.49600366882383e-28	3.26398076741788e-22
12:69681413	306	-0.404392	-11.7824	7.53136583287645e-28	3.26400044172173e-22
12:69683502	306	-0.40438	-11.782	7.56166706099163e-28	3.26617230800514e-22
12:69677124	306	-0.402388	-11.7695	8.45099955402449e-28	3.63814122300829e-22
12:69624287	306	-0.401868	-11.7577	9.3847085826199e-28	3.92633545951636e-22
12:69627163	306	-0.401865	-11.7575	9.39405616739171e-28	3.92633545951636e-22
12:69630911	306	-0.401865	-11.7575	9.39405616739171e-28	3.92633545951636e-22
12:69638298	306	-0.401865	-11.7575	9.39405616739171e-28	3.92633545951636e-22
12:69639238	306	-0.401865	-11.7575	9.39405616739171e-28	3.92633545951636e-22
12:69643321	306	-0.401865	-11.7575	9.39405616739171e-28	3.92633545951636e-22
12:69653146	306	-0.401865	-11.7575	9.39405616739171e-28	3.92633545951636e-22
12:69661131	306	-0.401865	-11.7575	9.39405616739171e-28	3.92633545951636e-22
12:69667075	306	-0.401865	-11.7575	9.39405616739171e-28	3.92633545951636e-22
6:32652435	363	0.68563	11.7371	1.12693803578027e-27	4.18643538790896e-22
12:69712608	306	-0.40361	-11.7471	1.03108164754421e-27	4.29560255611326e-22
6:32616993	363	1.05469	11.7254	1.25035548844712e-27	4.63535851618828e-22
6:32583813	363	0.727173	11.7238	1.26770351342823e-27	4.69002142853457e-22
6:32651585	363	0.687581	11.6978	1.59610450024386e-27	5.89287995831325e-22
6:32648809	363	0.687325	11.6921	1.67915810872578e-27	5.97898093253531e-22
6:32648893	363	0.687325	11.6921	1.67915810872578e-27	5.97898093253531e-22
6:32649773	363	0.687325	11.6921	1.67915810872578e-27	5.97898093253531e-22
6:32650256	363	0.687325	11.6921	1.67915810872578e-27	5.97898093253531e-22
6:32650293	363	0.687325	11.6921	1.67915810872578e-27	5.97898093253531e-22
6:32650467	363	0.687325	11.6921	1.67915810872578e-27	5.97898093253531e-22
6:32650588	363	0.687325	11.6921	1.67915810872578e-27	5.97898093253531e-22
6:32650757	363	0.687325	11.6921	1.67915810872578e-27	5.97898093253531e-22
6:32651005	363	0.687351	11.6927	1.67051204909946e-27	5.97898093253531e-22
6:32651117	363	0.687325	11.6921	1.67915810872578e-27	5.97898093253531e-22
6:32651363	363	0.687325	11.6921	1.67915810872578e-27	5.97898093253531e-22
6:32651894	363	0.687325	11.6921	1.67915810872578e-27	5.97898093253531e-22
6:32652359	363	0.687325	11.6921	1.67915810872578e-27	5.97898093253531e-22
6:32652363	363	0.687325	11.6921	1.67915810872578e-27	5.97898093253531e-22
6:32652687	363	0.687325	11.6921	1.67915810872578e-27	5.97898093253531e-22
6:32653283	363	0.687325	11.6921	1.67915810872578e-27	5.97898093253531e-22
6:32657543	363	0.687325	11.6921	1.67915810872578e-27	5.97898093253531e-22
6:32665079	363	0.687325	11.6921	1.67915810872578e-27	5.97898093253531e-22
12:69686132	306	-0.403064	-11.7017	1.54285376934945e-27	6.3660956193162e-22
12:69687051	306	-0.403064	-11.7017	1.54285376934945e-27	6.3660956193162e-22
12:69692166	306	-0.403064	-11.7017	1.54285376934945e-27	6.3660956193162e-22
12:69684127	476	0.403052	11.6769	1.92212138143892e-27	7.90576482013202e-22
6:32580657	363	0.726293	11.6515	2.40639311171967e-27	8.55154746603944e-22
12:69712003	306	-0.396993	-11.653	2.37453438772517e-27	9.73555329865119e-22
6:32395568	363	0.672785	11.631	2.88318893837313e-27	9.78283381939916e-22
6:32396057	363	0.672785	11.631	2.88318893837313e-27	9.78283381939916e-22
6:32396450	363	0.672785	11.631	2.88318893837313e-27	9.78283381939916e-22
6:32396964	363	0.672785	11.631	2.88318893837313e-27	9.78283381939916e-22
6:32397266	363	0.672785	11.631	2.88318893837313e-27	9.78283381939916e-22
6:32397403	363	0.672785	11.631	2.88318893837313e-27	9.78283381939916e-22
6:32397794	363	0.672785	11.631	2.88318893837313e-27	9.78283381939916e-22
6:32398202	363	0.672785	11.631	2.88318893837313e-27	9.78283381939916e-22
6:32398563	363	0.672785	11.631	2.88318893837313e-27	9.78283381939916e-22
6:32398675	363	0.672785	11.631	2.88318893837313e-27	9.78283381939916e-22
6:32399092	363	0.672785	11.631	2.88318893837313e-27	9.78283381939916e-22
6:32399833	363	0.672785	11.631	2.88318893837313e-27	9.78283381939916e-22
6:32400070	363	0.672785	11.631	2.88318893837313e-27	9.78283381939916e-22
6:32400538	363	0.672785	11.631	2.88318893837313e-27	9.78283381939916e-22
6:32400865	363	0.672785	11.631	2.88318893837313e-27	9.78283381939916e-22
6:32401261	363	0.672785	11.631	2.88318893837313e-27	9.78283381939916e-22
6:32401263	363	0.672785	11.631	2.88318893837313e-27	9.78283381939916e-22
6:32401996	363	0.672785	11.631	2.88318893837313e-27	9.78283381939916e-22
6:32402225	363	0.672785	11.631	2.88318893837313e-27	9.78283381939916e-22
6:32402440	363	0.672785	11.631	2.88318893837313e-27	9.78283381939916e-22
6:32402464	363	0.672785	11.631	2.88318893837313e-27	9.78283381939916e-22
6:32402692	363	0.672785	11.631	2.88318893837313e-27	9.78283381939916e-22
6:32404093	363	0.672785	11.631	2.88318893837313e-27	9.78283381939916e-22
6:32406530	363	0.672785	11.631	2.88318893837313e-27	9.78283381939916e-22
6:32402889	363	0.666396	11.5914	4.09070672246997e-27	1.38539241775846e-21
12:69691308	306	-0.399353	-11.6023	3.7162375316083e-27	1.51882980724192e-21
12:69618417	306	-0.395103	-11.5645	5.18751563496594e-27	2.11345441797487e-21
6:32614158	363	1.75986	11.5303	7.0092327489725e-27	2.36935080343621e-21
6:32406807	363	0.658366	11.5256	7.30792952496256e-27	2.46108527926503e-21
6:32407709	363	0.658366	11.5256	7.30792952496256e-27	2.46108527926503e-21
6:32448599	363	0.671319	11.5153	8.00275874023727e-27	2.69005419098257e-21
6:32555779	363	1.59036	11.5077	8.55503522021885e-27	2.87034176569769e-21
6:32338986	363	0.726627	11.5034	8.88627276410166e-27	2.97593511769023e-21
6:32623487	363	0.746776	11.5021	8.98516385145991e-27	3.00347022052562e-21
6:32408527	363	0.66541	11.4955	9.52021510977626e-27	3.17055718419788e-21
6:32409656	363	0.66541	11.4955	9.52021510977626e-27	3.17055718419788e-21
6:32552617	363	0.754042	11.49	9.99027545740533e-27	3.32096478703673e-21
6:32542772	363	2.12656	11.4488	1.43525478277658e-26	4.76228374023999e-21
6:32390904	363	0.66129	11.4485	1.43903646626843e-26	4.76605438754197e-21
6:32392661	363	0.660896	11.4302	1.68929550710179e-26	5.58464046711541e-21
12:69615090	306	-0.391861	-11.4524	1.39073028278789e-26	5.64817989487152e-21
6:32369488	363	1.25816	11.4053	2.09995079051732e-26	6.92951069329104e-21
12:69636314	306	-0.387089	-11.2706	6.8070772190697e-26	2.74728318532576e-20
12:69646914	306	-0.387089	-11.2706	6.8070772190697e-26	2.74728318532576e-20
6:32503879	363	0.708869	11.2471	8.34936162251654e-26	2.75012250013024e-20
12:69711886	306	-0.388223	-11.2486	8.24454268550103e-26	3.27624174018805e-20
12:69715913	306	-0.388223	-11.2486	8.24454268550103e-26	3.27624174018805e-20
12:69720691	306	-0.388223	-11.2486	8.24454268550103e-26	3.27624174018805e-20
12:69721970	306	-0.388223	-11.2486	8.24454268550103e-26	3.27624174018805e-20
12:69722880	306	-0.388223	-11.2486	8.24454268550103e-26	3.27624174018805e-20
12:69713085	306	-0.388361	-11.2444	8.54946799835506e-26	3.38699238421336e-20
12:69654187	306	-0.385253	-11.2403	8.85872495981093e-26	3.45649516373747e-20
12:69658330	306	-0.385253	-11.2403	8.85872495981093e-26	3.45649516373747e-20
12:69659299	306	-0.385253	-11.2403	8.85872495981093e-26	3.45649516373747e-20
12:69671791	306	-0.385253	-11.2403	8.85872495981093e-26	3.45649516373747e-20
12:69674187	306	-0.385253	-11.2403	8.85872495981093e-26	3.45649516373747e-20
6:32273060	363	0.720109	11.1924	1.34183929920152e-25	4.41170071708188e-20
12:69669225	306	-0.385461	-11.2057	1.19602733447535e-25	4.61093529056191e-20
12:69669851	306	-0.385461	-11.2057	1.19602733447535e-25	4.61093529056191e-20
12:69670186	306	-0.385461	-11.2057	1.19602733447535e-25	4.61093529056191e-20
12:69705362	306	-0.389058	-11.2066	1.18725147130598e-25	4.61093529056191e-20
6:32668831	363	1.11388	11.1661	1.6859563318805e-25	5.52293238635286e-20
6:32668846	363	1.11388	11.1661	1.6859563318805e-25	5.52293238635286e-20
6:32282854	363	0.719376	11.1647	1.7063331378923e-25	5.57953903727335e-20
12:69688757	306	-0.388485	-11.1803	1.49066783681109e-25	5.66232369971274e-20
12:69692420	306	-0.388485	-11.1803	1.49066783681109e-25	5.66232369971274e-20
12:69696400	306	-0.388485	-11.1803	1.49066783681109e-25	5.66232369971274e-20
12:69699638	306	-0.388485	-11.1803	1.49066783681109e-25	5.66232369971274e-20
12:69700772	306	-0.388485	-11.1803	1.49066783681109e-25	5.66232369971274e-20
12:69682327	306	-0.384674	-11.1791	1.5070204309884e-25	5.70765205724154e-20
6:32303848	363	0.719563	11.1593	1.7888660766903e-25	5.83881674522474e-20
6:32505443	363	0.738493	11.1472	1.98625237047329e-25	6.47135748583597e-20
6:32597064	363	0.680368	11.1456	2.01330946036118e-25	6.54767121728275e-20
6:32333341	363	0.714509	11.1322	2.26075906975451e-25	7.33917752677973e-20
6:32340070	363	0.69358	11.1206	2.49909632436701e-25	8.0983081547786e-20
6:32257284	363	0.714068	11.1125	2.68063948251261e-25	8.67100245105065e-20
6:32648149	363	0.897367	11.0948	3.12145881763916e-25	1.00788157233383e-19
6:32383108	363	0.651845	11.073	3.76996066606523e-25	1.21509743854378e-19
6:32648553	363	0.918755	11.0702	3.86164395441878e-25	1.24242532809565e-19
12:69713018	306	-0.380361	-11.0794	3.56530251228038e-25	1.34636560470689e-19
6:32637994	363	0.657057	11.0289	5.5106830611913e-25	1.76826687078264e-19
6:32653721	363	0.657033	11.0284	5.53529562179041e-25	1.76826687078264e-19
6:32653997	363	0.657033	11.0284	5.53529562179041e-25	1.76826687078264e-19
6:32654037	363	0.657033	11.0284	5.53529562179041e-25	1.76826687078264e-19
12:69621264	306	-0.380175	-11.0392	5.04118602429041e-25	1.89815351149882e-19
6:32603098	363	-0.634847	-11.0181	6.04423118738785e-25	1.92743044137779e-19
6:32665759	363	1.08126	10.9964	7.28444134800229e-25	2.31881400058585e-19
12:69619736	306	-0.381261	-11.0146	6.22882009786403e-25	2.33851453845666e-19
6:32610934	363	0.841119	10.9586	1.00726980764327e-24	3.20072860930862e-19
6:32602238	363	-0.63002	-10.9443	1.13876635836029e-24	3.61220498125546e-19
6:32602334	363	-0.630032	-10.944	1.14150171928163e-24	3.61451804948243e-19
6:32599485	363	-0.62827	-10.9341	1.24281905740942e-24	3.90105529271849e-19
6:32599999	363	-0.62827	-10.9341	1.24281905740942e-24	3.90105529271849e-19
6:32600317	363	-0.62827	-10.9341	1.24281905740942e-24	3.90105529271849e-19
6:32600404	363	-0.62827	-10.9341	1.24281905740942e-24	3.90105529271849e-19
6:32600448	363	-0.62827	-10.9341	1.24281905740942e-24	3.90105529271849e-19
6:32593356	363	-0.630987	-10.9081	1.55246246021306e-24	4.86451287217873e-19
6:32631133	363	0.778112	10.9047	1.59877187634406e-24	5.00092234581118e-19
6:32590501	363	0.665052	10.8783	2.00327354350092e-24	6.25533447561312e-19
6:32648300	363	0.876084	10.8475	2.60578504320863e-24	8.12263321647861e-19
6:32607611	363	0.702961	10.843	2.70574471232297e-24	8.41965601789808e-19
6:32552416	363	0.869774	10.7777	4.71699494376827e-24	1.46528974915715e-18
6:32591315	363	0.863339	10.7748	4.83595577787477e-24	1.4996581866323e-18
6:32600671	363	1.94895	10.7574	5.60437069360599e-24	1.73496198354473e-18
6:32614334	363	0.698772	10.7492	6.00854566617736e-24	1.85689311405433e-18
6:32384721	363	0.630982	10.7239	7.44540579150024e-24	2.28526393452008e-18
6:32385453	363	0.630982	10.7239	7.44540579150024e-24	2.28526393452008e-18
6:32385750	363	0.630982	10.7239	7.44540579150024e-24	2.28526393452008e-18
6:32386964	363	0.630982	10.7239	7.44540579150024e-24	2.28526393452008e-18
12:69738139	476	0.44677	10.6859	1.0276472357325e-23	3.81379674342629e-18
12:69738293	476	0.44677	10.6859	1.0276472357325e-23	3.81379674342629e-18
12:69739941	476	0.44677	10.6859	1.0276472357325e-23	3.81379674342629e-18
12:69742967	476	0.44677	10.6859	1.0276472357325e-23	3.81379674342629e-18
6:32667107	363	1.10707	10.662	1.25717825447572e-23	3.85217163054886e-18
6:32408044	363	0.627118	10.6528	1.35865110603072e-23	4.15603069185421e-18
6:32427789	363	0.654146	10.6501	1.39053705760255e-23	4.24635843175996e-18
6:32340068	363	0.661335	10.6452	1.44878182048895e-23	4.41673762724576e-18
12:69743639	476	0.440259	10.6673	1.20251940961392e-23	4.44999371037057e-18
12:69645235	105	-0.592428	-10.6489	1.40491632347537e-23	5.18412116339092e-18
6:32652196	363	1.09957	10.5924	2.26134978292623e-23	6.88227672997454e-18
6:32652620	363	0.6665	10.5921	2.26740343527853e-23	6.8890637106119e-18
6:32613976	363	0.655578	10.5915	2.27746638091727e-23	6.90798878871103e-18
6:32429303	363	0.639205	10.5867	2.37113715462961e-23	7.18002248496384e-18
6:32648550	363	0.899281	10.5777	2.55888259292731e-23	7.73553213240944e-18
6:32619170	363	0.942392	10.5626	2.90369174899273e-23	8.17871300504707e-18
6:32648987	363	1.09397	10.5611	2.94153405353816e-23	8.17871300504707e-18
6:32649088	363	1.09397	10.5611	2.94153405353816e-23	8.17871300504707e-18
6:32649126	363	1.09397	10.5611	2.94153405353816e-23	8.17871300504707e-18
6:32649161	363	1.09397	10.5611	2.94153405353816e-23	8.17871300504707e-18
6:32653263	363	1.09397	10.5611	2.94153405353816e-23	8.17871300504707e-18
6:32654714	363	1.09397	10.5611	2.94153405353816e-23	8.17871300504707e-18
6:32656947	363	1.09397	10.5611	2.94153405353816e-23	8.17871300504707e-18
6:32657710	363	1.09397	10.5611	2.94153405353816e-23	8.17871300504707e-18
6:32658335	363	1.09397	10.5611	2.94153405353816e-23	8.17871300504707e-18
6:32658665	363	1.09397	10.5611	2.94153405353816e-23	8.17871300504707e-18
6:32659099	363	1.09397	10.5611	2.94153405353816e-23	8.17871300504707e-18
6:32659839	363	1.09397	10.5611	2.94153405353816e-23	8.17871300504707e-18
6:32662607	363	1.09397	10.5611	2.94153405353816e-23	8.17871300504707e-18
6:32663308	363	1.09397	10.5611	2.94153405353816e-23	8.17871300504707e-18
6:32663431	363	1.09397	10.5611	2.94153405353816e-23	8.17871300504707e-18
6:32664126	363	1.09397	10.5611	2.94153405353816e-23	8.17871300504707e-18
6:32664990	363	1.09397	10.5611	2.94153405353816e-23	8.17871300504707e-18
6:32665255	363	1.09397	10.5611	2.94153405353816e-23	8.17871300504707e-18
6:32665319	363	1.09397	10.5611	2.94153405353816e-23	8.17871300504707e-18
6:32665640	363	1.09397	10.5611	2.94153405353816e-23	8.17871300504707e-18
6:32665909	363	1.09397	10.5611	2.94153405353816e-23	8.17871300504707e-18
6:32665912	363	1.09397	10.5611	2.94153405353816e-23	8.17871300504707e-18
6:32666635	363	1.09397	10.5611	2.94153405353816e-23	8.17871300504707e-18
6:32666651	363	1.09397	10.5611	2.94153405353816e-23	8.17871300504707e-18
6:32666660	363	1.09397	10.5611	2.94153405353816e-23	8.17871300504707e-18
6:32669013	363	1.09397	10.5611	2.94153405353816e-23	8.17871300504707e-18
6:32669454	363	1.09397	10.5611	2.94153405353816e-23	8.17871300504707e-18
6:32669483	363	1.09397	10.5611	2.94153405353816e-23	8.17871300504707e-18
6:32669761	363	1.09397	10.5611	2.94153405353816e-23	8.17871300504707e-18
6:32670548	363	1.09397	10.5611	2.94153405353816e-23	8.17871300504707e-18
6:32670912	363	1.09397	10.5611	2.94153405353816e-23	8.17871300504707e-18
6:32671057	363	1.09397	10.5611	2.94153405353816e-23	8.17871300504707e-18
6:32671086	363	1.09397	10.5611	2.94153405353816e-23	8.17871300504707e-18
6:32671247	363	1.09397	10.5611	2.94153405353816e-23	8.17871300504707e-18
6:32671332	363	1.09397	10.5611	2.94153405353816e-23	8.17871300504707e-18
6:32671412	363	1.09397	10.5611	2.94153405353816e-23	8.17871300504707e-18
6:32671755	363	1.09397	10.5611	2.94153405353816e-23	8.17871300504707e-18
6:32672624	363	1.09397	10.5611	2.94153405353816e-23	8.17871300504707e-18
6:32672641	363	1.09397	10.5611	2.94153405353816e-23	8.17871300504707e-18
6:32673099	363	1.09397	10.5611	2.94153405353816e-23	8.17871300504707e-18
6:32673385	363	1.09397	10.5611	2.94153405353816e-23	8.17871300504707e-18
6:32673574	363	1.09397	10.5611	2.94153405353816e-23	8.17871300504707e-18
6:32673931	363	1.09397	10.5611	2.94153405353816e-23	8.17871300504707e-18
6:32675523	363	1.09397	10.5611	2.94153405353816e-23	8.17871300504707e-18
6:32675634	363	1.09397	10.5611	2.94153405353816e-23	8.17871300504707e-18
6:32676159	363	1.09397	10.5611	2.94153405353816e-23	8.17871300504707e-18
6:32678491	363	1.09397	10.5611	2.94153405353816e-23	8.17871300504707e-18
6:32680299	363	1.09397	10.5611	2.94153405353816e-23	8.17871300504707e-18
6:32680620	363	1.09397	10.5611	2.94153405353816e-23	8.17871300504707e-18
6:32681483	363	1.09397	10.5611	2.94153405353816e-23	8.17871300504707e-18
6:32681530	363	1.09397	10.5611	2.94153405353816e-23	8.17871300504707e-18
6:32667850	363	1.09877	10.5597	2.97554529773258e-23	8.26053096472152e-18
6:32624923	363	0.826883	10.5495	3.24327936932734e-23	8.98534336597228e-18
6:32648285	363	1.09341	10.5494	3.24660589008137e-23	8.98534336597228e-18
12:69738139	105	-0.698672	-10.5802	2.50608318943572e-23	9.142920646159e-18
12:69738293	105	-0.698672	-10.5802	2.50608318943572e-23	9.142920646159e-18
12:69739941	105	-0.698672	-10.5802	2.50608318943572e-23	9.142920646159e-18
12:69742967	105	-0.698672	-10.5802	2.50608318943572e-23	9.142920646159e-18
6:32427748	363	0.614354	10.5416	3.46630963101073e-23	9.57868413625228e-18
6:32414287	363	0.649478	10.5384	3.55924711104984e-23	9.74581901015983e-18
6:32415522	363	0.649478	10.5384	3.55924711104984e-23	9.74581901015983e-18
6:32418579	363	0.649478	10.5384	3.55924711104984e-23	9.74581901015983e-18
6:32420179	363	0.649478	10.5384	3.55924711104984e-23	9.74581901015983e-18
6:32420238	363	0.649481	10.5384	3.55904446055741e-23	9.74581901015983e-18
6:32424677	363	0.649478	10.5384	3.55924711104984e-23	9.74581901015983e-18
6:32629146	363	0.680886	10.514	4.36578481917775e-23	1.19361153194004e-17
6:32682019	363	1.08472	10.5065	4.64891551266686e-23	1.2690940625613e-17
6:32682137	363	1.08467	10.5056	4.68758258819313e-23	1.27771374627631e-17
6:32426458	363	0.648472	10.5008	4.87897528812701e-23	1.32787355910087e-17
12:69684127	105	-0.586747	-10.5347	3.67211071638969e-23	1.33591905060949e-17
6:32448500	363	0.669913	10.4888	5.39159638926321e-23	1.46517648393384e-17
6:32650268	363	0.825043	10.4743	6.08785967574721e-23	1.64941174371261e-17
6:32657560	363	0.825043	10.4743	6.08785967574721e-23	1.64941174371261e-17
6:32648502	363	0.900202	10.4373	8.29281188181901e-23	2.24343596991765e-17
6:32518235	363	-0.592994	-10.4171	9.819109254751e-23	2.65235928499606e-17
6:32623277	363	0.849317	10.414	1.00744481790581e-22	2.71725814385205e-17
6:32612620	363	0.998585	10.4052	1.08431128408562e-22	2.92020912586895e-17
12:69645235	306	-0.371226	-10.4191	9.65741716544821e-23	3.50351291631756e-17
6:32562023	363	0.700931	10.3806	1.33070089979919e-22	3.57842353982342e-17
6:32521117	363	-0.593616	-10.37	1.45303406999212e-22	3.90156971596998e-17
6:32627046	363	1.08998	10.3348	1.94580495550027e-22	5.21694341577256e-17
6:32596423	363	-0.597003	-10.3037	2.51998784515638e-22	6.74635943601179e-17
6:32631265	363	0.744829	10.2958	2.68933986564656e-22	7.18905634426318e-17
6:32596647	363	-0.597462	-10.2913	2.79165069963026e-22	7.45149472634717e-17
12:69743639	105	-0.67586	-10.3179	2.23901243033778e-22	8.09992537456327e-17
6:32627050	363	1.08485	10.2681	3.38185714772735e-22	9.01352477946388e-17
6:32637180	363	0.698717	10.2679	3.38753121173433e-22	9.01531136949766e-17
6:32341353	363	0.621332	10.2618	3.56344689063756e-22	9.45554597137711e-17
6:32342691	363	0.621332	10.2618	3.56344689063756e-22	9.45554597137711e-17
6:32593010	363	-0.593408	-10.247	4.02785602457321e-22	1.04422546814366e-16
6:32595747	363	-0.593404	-10.2469	4.03062550671035e-22	1.04422546814366e-16
6:32595783	363	-0.593399	-10.2468	4.03382846803177e-22	1.04422546814366e-16
6:32595859	363	-0.593404	-10.2469	4.03062550671035e-22	1.04422546814366e-16
6:32595954	363	-0.593409	-10.2469	4.02880200300036e-22	1.04422546814366e-16
6:32596773	363	-0.593404	-10.2469	4.03062550671035e-22	1.04422546814366e-16
6:32597034	363	-0.593404	-10.2469	4.03062550671035e-22	1.04422546814366e-16
6:32599223	363	-0.593404	-10.2469	4.03062550671035e-22	1.04422546814366e-16
6:32599338	363	-0.593404	-10.2469	4.03062550671035e-22	1.04422546814366e-16
6:32599401	363	-0.593404	-10.2469	4.03062550671035e-22	1.04422546814366e-16
6:32599896	363	-0.593404	-10.2469	4.03062550671035e-22	1.04422546814366e-16
6:32600228	363	-0.593404	-10.2469	4.03062550671035e-22	1.04422546814366e-16
6:32600253	363	-0.593408	-10.2469	4.02980194823365e-22	1.04422546814366e-16
6:32600411	363	-0.593404	-10.2469	4.03062550671035e-22	1.04422546814366e-16
6:32600501	363	-0.593404	-10.2469	4.03062550671035e-22	1.04422546814366e-16
6:32600638	363	-0.593404	-10.2469	4.03062550671035e-22	1.04422546814366e-16
6:32600914	363	-0.593404	-10.2469	4.03062550671035e-22	1.04422546814366e-16
6:32593179	363	-0.594053	-10.2324	4.54306584265287e-22	1.17436296624036e-16
6:32635949	363	0.695742	10.2178	5.12150996426767e-22	1.3219915938783e-16
6:32637772	363	0.695295	10.2108	5.42583956699152e-22	1.39854313811761e-16
6:32600803	363	-0.592777	-10.21	5.46364572725714e-22	1.40627606592644e-16
6:32595027	363	-0.59327	-10.1905	6.4149873495288e-22	1.64878444114926e-16
6:32629891	363	0.633702	10.1634	8.01596795611632e-22	2.05733471596212e-16
12:69727190	105	-0.657339	-10.2027	5.8046745058483e-22	2.09405254215937e-16
12:69684127	306	-0.363556	-10.1643	7.95735470079745e-22	2.86264172961181e-16
6:32594734	363	-0.5914	-10.09	1.46434901682739e-21	3.75297238812682e-16
6:32219320	363	0.690001	10.0806	1.5809405220049e-21	4.04602876790348e-16
6:32411646	363	0.629529	10.0735	1.67582485968368e-21	4.23472480654274e-16
6:32412398	363	0.629529	10.0735	1.67582485968368e-21	4.23472480654274e-16
6:32412480	363	0.629529	10.0735	1.67582485968368e-21	4.23472480654274e-16
6:32412539	363	0.629529	10.0735	1.67582485968368e-21	4.23472480654274e-16
6:32413094	363	0.629529	10.0735	1.67582485968368e-21	4.23472480654274e-16
6:32413150	363	0.629529	10.0735	1.67582485968368e-21	4.23472480654274e-16
6:32413259	363	0.629529	10.0735	1.67582485968368e-21	4.23472480654274e-16
6:32413459	363	0.629529	10.0735	1.67582485968368e-21	4.23472480654274e-16
6:32413830	363	0.629529	10.0735	1.67582485968368e-21	4.23472480654274e-16
6:32595907	363	-0.591723	-10.0589	1.88790102702862e-21	4.76394901808525e-16
6:32425983	363	0.58863	10.0561	1.93189854326461e-21	4.86815466276644e-16
12:69726850	105	-0.650641	-10.0792	1.5986324350883e-21	5.73507165765102e-16
6:32626021	363	0.842256	10.0189	2.61681382019193e-21	6.58485015649037e-16
6:32595223	363	-0.589681	-10.0128	2.75017883582813e-21	6.9011677732508e-16
6:32629764	363	0.618813	10.0129	2.7468884230366e-21	6.9011677732508e-16
6:32594295	363	-0.5845	-10.0109	2.79236248513216e-21	6.99727590389414e-16
6:32626382	363	0.842517	10.0018	3.00807803250459e-21	7.52736015601946e-16
6:32630094	363	0.63923	9.99985	3.05514244970887e-21	7.63452979025966e-16
6:32595231	363	-0.587525	-9.97275	3.80871581376862e-21	9.50446040499186e-16
6:32627652	363	0.622611	9.95588	4.36810582349576e-21	1.08853136705113e-15
6:32628420	363	0.621426	9.94905	4.61726090008745e-21	1.14903152245871e-15
6:32583212	363	0.631466	9.93874	5.01976420291201e-21	1.24404187907147e-15
6:32583653	363	0.631466	9.93874	5.01976420291201e-21	1.24404187907147e-15
6:32584153	363	0.631466	9.93874	5.01976420291201e-21	1.24404187907147e-15
6:32621467	363	0.677223	9.93588	5.13789168475442e-21	1.27156820285677e-15
6:32682429	363	1.07022	9.8582	9.63179835128877e-21	2.38048773202912e-15
6:32572202	363	0.614368	9.85773	9.66903881005707e-21	2.38641811776192e-15
6:32605257	363	0.620202	9.83679	1.14476415342162e-20	2.82153043321756e-15
6:32376882	363	0.583163	9.82845	1.22437394897766e-20	2.91025449799773e-15
6:32376932	363	0.583163	9.82845	1.22437394897766e-20	2.91025449799773e-15
6:32377061	363	0.583163	9.82845	1.22437394897766e-20	2.91025449799773e-15
6:32377116	363	0.583163	9.82845	1.22437394897766e-20	2.91025449799773e-15
6:32377470	363	0.583163	9.82845	1.22437394897766e-20	2.91025449799773e-15
6:32377539	363	0.583163	9.82845	1.22437394897766e-20	2.91025449799773e-15
6:32377588	363	0.583163	9.82845	1.22437394897766e-20	2.91025449799773e-15
6:32378787	363	0.583163	9.82845	1.22437394897766e-20	2.91025449799773e-15
6:32378834	363	0.583163	9.82845	1.22437394897766e-20	2.91025449799773e-15
6:32378866	363	0.583163	9.82845	1.22437394897766e-20	2.91025449799773e-15
6:32378877	363	0.583163	9.82845	1.22437394897766e-20	2.91025449799773e-15
6:32378982	363	0.583163	9.82845	1.22437394897766e-20	2.91025449799773e-15
6:32379011	363	0.583163	9.82845	1.22437394897766e-20	2.91025449799773e-15
6:32379031	363	0.583163	9.82845	1.22437394897766e-20	2.91025449799773e-15
6:32379047	363	0.583163	9.82845	1.22437394897766e-20	2.91025449799773e-15
6:32379101	363	0.583163	9.82845	1.22437394897766e-20	2.91025449799773e-15
6:32379239	363	0.583163	9.82845	1.22437394897766e-20	2.91025449799773e-15
6:32379445	363	0.583163	9.82845	1.22437394897766e-20	2.91025449799773e-15
6:32379682	363	0.583163	9.82845	1.22437394897766e-20	2.91025449799773e-15
6:32380190	363	0.583163	9.82845	1.22437394897766e-20	2.91025449799773e-15
6:32380262	363	0.583163	9.82845	1.22437394897766e-20	2.91025449799773e-15
6:32380782	363	0.583163	9.82845	1.22437394897766e-20	2.91025449799773e-15
6:32380785	363	0.583163	9.82845	1.22437394897766e-20	2.91025449799773e-15
6:32380818	363	0.583163	9.82845	1.22437394897766e-20	2.91025449799773e-15
6:32380826	363	0.583163	9.82845	1.22437394897766e-20	2.91025449799773e-15
6:32380860	363	0.583163	9.82845	1.22437394897766e-20	2.91025449799773e-15
6:32381041	363	0.58317	9.82847	1.22415006017003e-20	2.91025449799773e-15
6:32658933	363	0.63131	9.81352	1.38077700354848e-20	3.2776899063878e-15
6:32431927	363	0.597485	9.81001	1.42039726483521e-20	3.36730402370076e-15
6:32628712	363	0.966348	9.80726	1.45208394949094e-20	3.43789938640877e-15
6:32375745	363	0.583426	9.80072	1.53057081873215e-20	3.61422333246657e-15
6:32376618	363	0.583426	9.80072	1.53057081873215e-20	3.61422333246657e-15
6:32587213	363	0.614926	9.7872	1.70632905241578e-20	4.02397728883938e-15
6:32633085	363	0.86864	9.77837	1.83176001300265e-20	4.31413005467591e-15
6:32629347	363	0.675456	9.77506	1.88109556181543e-20	4.42454058767139e-15
6:32595147	363	-0.583264	-9.7672	2.00359446306795e-20	4.70652698569293e-15
6:32607735	363	0.616484	9.76288	2.07426372640988e-20	4.86618759092262e-15
6:32620286	363	0.614949	9.75744	2.16688175268908e-20	5.07685742138649e-15
6:32620283	363	0.614481	9.74892	2.32020446497744e-20	5.42902232158029e-15
6:32414290	363	0.646312	9.73026	2.69437123446674e-20	6.29635417471756e-15
6:32633159	363	0.928075	9.71959	2.93463698857987e-20	6.84893715269324e-15
6:32645906	363	0.663273	9.68955	3.73111970804108e-20	8.69652567241039e-15
6:32600602	363	-0.565808	-9.67919	4.0529429091571e-20	9.43442898394314e-15
6:32381736	363	0.57964	9.67784	4.09676617580457e-20	9.52413557476094e-15
6:32441555	363	0.590011	9.66839	4.4178243098739e-20	1.02572942351346e-14
6:32440910	363	0.590329	9.66572	4.51271907750787e-20	1.04641359752022e-14
6:32646193	363	0.673288	9.66341	4.59654965279839e-20	1.06448232104006e-14
6:32440805	363	0.590178	9.66287	4.6164942762553e-20	1.06772875288104e-14
6:32594953	363	-0.630988	-9.65768	4.81158708371445e-20	1.11142418237623e-14
6:32440362	363	0.590161	9.65666	4.85096096713917e-20	1.11908439678734e-14
6:32429594	363	0.589454	9.65291	4.99805806329651e-20	1.13844199538714e-14
6:32430289	363	0.589454	9.65291	4.99805806329651e-20	1.13844199538714e-14
6:32431147	363	0.589454	9.65291	4.99805806329651e-20	1.13844199538714e-14
6:32431606	363	0.589454	9.65291	4.99805806329651e-20	1.13844199538714e-14
6:32431867	363	0.589454	9.65291	4.99805806329651e-20	1.13844199538714e-14
6:32432509	363	0.589454	9.65291	4.99805806329651e-20	1.13844199538714e-14
6:32435044	363	0.589454	9.65291	4.99805806329651e-20	1.13844199538714e-14
6:32439964	363	0.589454	9.65291	4.99805806329651e-20	1.13844199538714e-14
6:32440467	363	0.589454	9.65291	4.99805806329651e-20	1.13844199538714e-14
6:32440879	363	0.589454	9.65291	4.99805806329651e-20	1.13844199538714e-14
6:32441408	363	0.589446	9.65265	5.00845714020443e-20	1.13937024701558e-14
12:69727190	476	0.400494	9.70313	3.34753776475315e-20	1.19759786301658e-14
6:32628917	363	0.787955	9.63001	5.9978683624004e-20	1.36273006261819e-14
6:32628941	363	0.783485	9.61984	6.50338091274515e-20	1.47572278856507e-14
6:32624817	363	1.00078	9.60361	7.3987578619502e-20	1.67678654355265e-14
6:32607829	363	0.602757	9.6022	7.48196176054855e-20	1.69351290620687e-14
6:32380715	363	0.579533	9.60112	7.54648774647019e-20	1.70597492724361e-14
6:32633185	363	0.881573	9.59748	7.76802597393131e-20	1.75385575408793e-14
6:32668411	363	0.968308	9.59133	8.15634413912164e-20	1.83922497880069e-14
6:32652344	363	0.72535	9.57811	9.05858048933825e-20	2.04012254329351e-14
6:32575658	363	-0.587754	-9.56379	1.01472663384223e-19	2.28245717489769e-14
6:32629500	363	0.875243	9.54954	1.13594360646464e-19	2.55192847247063e-14
6:32608931	363	0.610743	9.53921	1.23270911281095e-19	2.76586612601267e-14
6:32609173	363	0.607564	9.53622	1.26221042565795e-19	2.82853663813969e-14
6:32607926	363	0.58927	9.51873	1.44934984520604e-19	3.2438700078949e-14
6:32345595	363	0.575935	9.5061	1.60139447882093e-19	3.57528680719808e-14
6:32346491	363	0.575935	9.5061	1.60139447882093e-19	3.57528680719808e-14
6:32643953	363	0.651901	9.5019	1.65539140453953e-19	3.69126673815586e-14
12:69757931	476	0.397443	9.53845	1.24013233223914e-19	4.37602378804696e-14
12:69758884	476	0.397443	9.53845	1.24013233223914e-19	4.37602378804696e-14
12:69761444	476	0.397443	9.53845	1.24013233223914e-19	4.37602378804696e-14
12:69770147	476	0.397443	9.53845	1.24013233223914e-19	4.37602378804696e-14
12:69771073	476	0.397443	9.53845	1.24013233223914e-19	4.37602378804696e-14
12:69790780	476	0.397256	9.53424	1.28221088047883e-19	4.51217695118258e-14
6:32648239	363	0.726995	9.46825	2.15827940486831e-19	4.80668031884093e-14
6:32566149	363	0.591229	9.46483	2.21724585569455e-19	4.93190755171938e-14
6:32413889	363	0.60155	9.45927	2.31637600641326e-19	5.14605350973472e-14
6:32542148	363	0.8258	9.45006	2.49050135928652e-19	5.52607593170802e-14
6:32441679	363	0.595264	9.4403	2.68904066187554e-19	5.95926801489679e-14
6:32662559	363	0.585577	9.41857	3.18939447476931e-19	7.05943472494961e-14
6:32440451	363	0.577355	9.41329	3.32436921480973e-19	7.3491605887864e-14
6:32651616	363	0.714051	9.4083	3.45714325697459e-19	7.62397412881271e-14
6:32651617	363	0.714051	9.4083	3.45714325697459e-19	7.62397412881271e-14
6:32594704	363	-0.595199	-9.40392	3.57781171007685e-19	7.88043646115051e-14
6:32624660	363	0.610381	9.39364	3.87797845958801e-19	8.53115013469672e-14
6:32539245	363	2.09609	9.38971	3.9994225555573e-19	8.78758488986088e-14
6:32633050	363	0.817559	9.37598	4.45327374543618e-19	9.77287467266572e-14
6:32625281	363	0.901722	9.37498	4.48832438721323e-19	9.83781188966896e-14
6:32593507	363	-0.587433	-9.37219	4.5872005015761e-19	1.0042318288818e-13
6:32607652	363	0.597143	9.37151	4.61175648844601e-19	1.00838238368695e-13
12:69738139	306	-0.405768	-9.4254	3.02301440414227e-19	1.05234716654386e-13
12:69738293	306	-0.405768	-9.4254	3.02301440414227e-19	1.05234716654386e-13
12:69739941	306	-0.405768	-9.4254	3.02301440414227e-19	1.05234716654386e-13
12:69742967	306	-0.405768	-9.4254	3.02301440414227e-19	1.05234716654386e-13
6:32441199	363	0.573686	9.36372	4.90136351215835e-19	1.07040729215859e-13
6:32668100	363	0.691325	9.34756	5.56139278424094e-19	1.21308048429282e-13
6:32629328	363	0.825428	9.34343	5.74381964023373e-19	1.25135743689283e-13
6:32642719	363	0.718355	9.3418	5.81740880272878e-19	1.26585902186093e-13
6:32603742	363	0.600907	9.33356	6.20378781752947e-19	1.34830609983837e-13
12:69792102	105	-0.608464	-9.39295	3.89926249228296e-19	1.3537306485137e-13
6:32620454	363	0.590658	9.32982	6.38723299545678e-19	1.3865028308927e-13
6:32629066	363	0.816065	9.32632	6.56400306807216e-19	1.4231603836091e-13
6:32624874	363	0.815391	9.31772	7.019709589697e-19	1.52013414223569e-13
6:32642337	363	0.727797	9.31235	7.31950798185049e-19	1.58315334015844e-13
6:32635033	363	0.745583	9.30465	7.77180782387263e-19	1.67896675460296e-13
6:32615446	363	0.586419	9.30355	7.83881844162993e-19	1.69141518186363e-13
6:32615427	363	0.588187	9.30326	7.85662076237255e-19	1.69322864555958e-13
6:32642335	363	0.727077	9.3031	7.86661042790216e-19	1.693356034302e-13
6:32381210	363	0.558001	9.29941	8.09539820098481e-19	1.74052510378131e-13
6:32319637	363	0.556782	9.29692	8.25447858285254e-19	1.77261238139501e-13
6:32642187	363	0.70806	9.28036	9.38903528187415e-19	2.01385305986689e-13
6:32629398	363	0.829219	9.2709	1.01055289717233e-18	2.16495637708543e-13
6:32297341	363	0.55571	9.26304	1.07419450994955e-18	2.29856574999258e-13
6:32612309	363	0.615902	9.26147	1.08734309618192e-18	2.32394112282018e-13
6:32667343	363	0.86959	9.2591	1.10753519966626e-18	2.36429239605058e-13
6:32627221	363	0.850858	9.23949	1.28955077395359e-18	2.72805799268761e-13
6:32649308	363	0.703804	9.23719	1.31276382760878e-18	2.72805799268761e-13
6:32649508	363	0.703804	9.23719	1.31276382760878e-18	2.72805799268761e-13
6:32649609	363	0.703804	9.23719	1.31276382760878e-18	2.72805799268761e-13
6:32649723	363	0.703804	9.23719	1.31276382760878e-18	2.72805799268761e-13
6:32649735	363	0.703804	9.23719	1.31276382760878e-18	2.72805799268761e-13
6:32650185	363	0.703804	9.23719	1.31276382760878e-18	2.72805799268761e-13
6:32650233	363	0.703804	9.23719	1.31276382760878e-18	2.72805799268761e-13
6:32650500	363	0.703804	9.23719	1.31276382760878e-18	2.72805799268761e-13
6:32650612	363	0.703804	9.23719	1.31276382760878e-18	2.72805799268761e-13
6:32651018	363	0.703804	9.23719	1.31276382760878e-18	2.72805799268761e-13
6:32651218	363	0.703804	9.23719	1.31276382760878e-18	2.72805799268761e-13
6:32651741	363	0.703804	9.23719	1.31276382760878e-18	2.72805799268761e-13
6:32651839	363	0.703804	9.23719	1.31276382760878e-18	2.72805799268761e-13
6:32651846	363	0.703804	9.23719	1.31276382760878e-18	2.72805799268761e-13
6:32652486	363	0.703804	9.23719	1.31276382760878e-18	2.72805799268761e-13
6:32653070	363	0.703804	9.23719	1.31276382760878e-18	2.72805799268761e-13
6:32653385	363	0.703804	9.23719	1.31276382760878e-18	2.72805799268761e-13
6:32653435	363	0.703804	9.23719	1.31276382760878e-18	2.72805799268761e-13
6:32654390	363	0.703804	9.23719	1.31276382760878e-18	2.72805799268761e-13
6:32654640	363	0.703804	9.23719	1.31276382760878e-18	2.72805799268761e-13
6:32655218	363	0.703804	9.23719	1.31276382760878e-18	2.72805799268761e-13
6:32657200	363	0.703804	9.23719	1.31276382760878e-18	2.72805799268761e-13
6:32386554	363	0.545541	9.23615	1.32338628858555e-18	2.74696420154254e-13
6:32619147	363	0.799237	9.23395	1.34619445114287e-18	2.7910917555131e-13
6:32628548	363	0.66212	9.23318	1.35419743976378e-18	2.80445728756782e-13
12:69790780	105	-0.613103	-9.29441	8.4167458384413e-19	2.91425875780637e-13
6:32623584	363	0.745127	9.22791	1.41070714557928e-18	2.91813114213247e-13
6:32636443	363	0.707788	9.22765	1.41353554424493e-18	2.92062866181106e-13
6:32212655	363	0.602231	9.22689	1.42180699986615e-18	2.93435395047405e-13
6:32635974	363	0.706929	9.22392	1.45489899511774e-18	2.99578667770122e-13
6:32636289	363	0.706947	9.22406	1.45338800600759e-18	2.99578667770122e-13
6:32592165	363	0.657142	9.22277	1.46796997641659e-18	3.01925060052445e-13
6:32624847	363	0.589219	9.21655	1.54037827838369e-18	3.16456402490089e-13
6:32608858	363	-0.561352	-9.20599	1.67160638947025e-18	3.43024864009613e-13
6:32306090	363	0.556082	9.20508	1.68333765316547e-18	3.44790260060309e-13
6:32614552	363	0.585006	9.20503	1.68403675860539e-18	3.44790260060309e-13
6:32512754	363	-0.540689	-9.20193	1.72485931479651e-18	3.52747434773961e-13
6:32634355	363	0.713272	9.19589	1.80732004431927e-18	3.6919224871323e-13
12:69757931	105	-0.611146	-9.2574	1.12224530737247e-18	3.83432328900795e-13
12:69758884	105	-0.611146	-9.2574	1.12224530737247e-18	3.83432328900795e-13
12:69761444	105	-0.611146	-9.2574	1.12224530737247e-18	3.83432328900795e-13
12:69770147	105	-0.611146	-9.2574	1.12224530737247e-18	3.83432328900795e-13
12:69771073	105	-0.611146	-9.2574	1.12224530737247e-18	3.83432328900795e-13
6:32339548	363	0.60457	9.18596	1.9515266116733e-18	3.98198728103166e-13
6:32648189	363	0.701165	9.18527	1.96186144012275e-18	3.99854658890358e-13
6:32620852	363	0.580066	9.17724	2.0874948609565e-18	4.2497975179754e-13
6:32628571	363	0.779778	9.17603	2.10704525622372e-18	4.28475738579811e-13
6:32629137	363	0.585899	9.16777	2.24578222547769e-18	4.56173565093183e-13
6:32619455	363	0.619081	9.14367	2.70419494994822e-18	5.48669887865536e-13
6:32614749	363	0.58015	9.13799	2.82501395909303e-18	5.72538810495759e-13
6:32340106	363	0.55806	9.12997	3.00508534574576e-18	6.08349139742733e-13
6:32594916	363	-0.580634	-9.12927	3.02114904097747e-18	6.10914651443852e-13
6:32627976	363	0.580211	9.12225	3.18895489948266e-18	6.44124201426165e-13
6:32627160	363	0.580895	9.11634	3.33708887918956e-18	6.73290379615791e-13
6:32631570	363	0.734991	9.11452	3.38401469499695e-18	6.81994411207655e-13
6:32637404	363	0.772857	9.11402	3.39720652321511e-18	6.83888039215028e-13
6:32605437	363	0.580344	9.11116	3.47252166981982e-18	6.98269462091453e-13
6:32628568	363	0.816323	9.10796	3.55899572583103e-18	7.14860198903641e-13
6:32634007	363	0.719102	9.10619	3.60768086080397e-18	7.23832151684124e-13
6:32635293	363	0.700682	9.10449	3.65515303057934e-18	7.32541050332621e-13
6:32607008	363	0.576032	9.09067	4.06436977363937e-18	8.13648442968073e-13
6:32627352	363	0.573613	9.08964	4.09670956404422e-18	8.19212327656152e-13
6:32636434	363	0.572643	9.08363	4.28973488564697e-18	8.56860275997054e-13
6:32627310	363	0.57629	9.07811	4.47519179737201e-18	8.92914749634785e-13
6:32623348	363	0.579666	9.07431	4.60759221304866e-18	9.12260220234392e-13
6:32665728	363	0.843434	9.07435	4.60636211969023e-18	9.12260220234392e-13
6:32666802	363	0.843434	9.07435	4.60636211969023e-18	9.12260220234392e-13
6:32666822	363	0.843434	9.07435	4.60636211969023e-18	9.12260220234392e-13
6:32666875	363	0.843434	9.07435	4.60636211969023e-18	9.12260220234392e-13
6:32666899	363	0.843434	9.07435	4.60636211969023e-18	9.12260220234392e-13
6:32666968	363	0.843434	9.07435	4.60636211969023e-18	9.12260220234392e-13
6:32615578	363	0.577167	9.0727	4.66477395009468e-18	9.22567859220069e-13
6:32615312	363	0.573882	9.06697	4.87437908366063e-18	9.62965121789211e-13
6:32628595	363	0.574677	9.06601	4.91030923228561e-18	9.69000854156349e-13
6:32627128	363	0.605594	9.06192	5.06639431259117e-18	9.98708821543785e-13
6:32634137	363	0.704638	9.06054	5.12031639855264e-18	1.00823506666866e-12
6:32629755	363	0.716531	9.05596	5.30292739424433e-18	1.0419153577013e-12
6:32667957	363	0.844398	9.05603	5.29998360090884e-18	1.0419153577013e-12
6:32591609	363	-0.546533	-9.05497	5.34329728073369e-18	1.04642378914751e-12
6:32667895	363	0.84426	9.05515	5.33609018057024e-18	1.04642378914751e-12
6:32667937	363	0.844267	9.05506	5.33948054016334e-18	1.04642378914751e-12
6:32635007	363	0.732842	9.05227	5.45485778749067e-18	1.0671117370889e-12
6:32608014	363	0.574982	9.05124	5.49784027576424e-18	1.07435371935451e-12
6:32613163	363	0.573831	9.04844	5.6168830453574e-18	1.0964271328349e-12
6:32620976	363	0.573302	9.04735	5.66427457843988e-18	1.10448143637379e-12
6:32615470	363	0.572949	9.04577	5.7327641178231e-18	1.11621003704181e-12
6:32615551	363	0.572765	9.04568	5.73681461441302e-18	1.11621003704181e-12
12:69743639	306	-0.38949	-9.11634	3.33701893803483e-18	1.13713542833174e-12
6:32604372	363	0.57227	9.03863	6.05479733440907e-18	1.14738792861837e-12
6:32605274	363	0.572278	9.03881	6.04633709192538e-18	1.14738792861837e-12
6:32605380	363	0.572267	9.03867	6.05296714413634e-18	1.14738792861837e-12
6:32608096	363	0.572261	9.0386	6.05626261709579e-18	1.14738792861837e-12
6:32609126	363	0.572261	9.0386	6.05626261709579e-18	1.14738792861837e-12
6:32609427	363	0.572265	9.03868	6.05219056397195e-18	1.14738792861837e-12
6:32610059	363	0.572261	9.0386	6.05626261709579e-18	1.14738792861837e-12
6:32614883	363	0.574614	9.04141	5.92753714002583e-18	1.14738792861837e-12
6:32615400	363	0.572261	9.0386	6.05626261709579e-18	1.14738792861837e-12
6:32615510	363	0.572261	9.0386	6.05626261709579e-18	1.14738792861837e-12
6:32615527	363	0.572261	9.0386	6.05626261709579e-18	1.14738792861837e-12
6:32615652	363	0.572261	9.0386	6.05626261709579e-18	1.14738792861837e-12
6:32615702	363	0.572261	9.0386	6.05626261709579e-18	1.14738792861837e-12
6:32615710	363	0.572261	9.0386	6.05626261709579e-18	1.14738792861837e-12
6:32620311	363	0.572261	9.0386	6.05626261709579e-18	1.14738792861837e-12
6:32620359	363	0.572261	9.0386	6.05626261709579e-18	1.14738792861837e-12
6:32620775	363	0.572283	9.03893	6.0410344810126e-18	1.14738792861837e-12
6:32623219	363	0.572261	9.0386	6.05626261709579e-18	1.14738792861837e-12
6:32623242	363	0.572261	9.0386	6.05626261709579e-18	1.14738792861837e-12
6:32623300	363	0.57244	9.04133	5.93089832706614e-18	1.14738792861837e-12
6:32627714	363	0.572261	9.0386	6.05626261709579e-18	1.14738792861837e-12
6:32627906	363	0.572261	9.0386	6.05626261709579e-18	1.14738792861837e-12
6:32627923	363	0.572261	9.0386	6.05626261709579e-18	1.14738792861837e-12
6:32628022	363	0.572261	9.0386	6.05626261709579e-18	1.14738792861837e-12
6:32628247	363	0.572261	9.0386	6.05626261709579e-18	1.14738792861837e-12
6:32623393	363	0.57226	9.03835	6.06784835392372e-18	1.14837535682665e-12
6:32620622	363	0.572242	9.03819	6.07501014947201e-18	1.1485243348852e-12
6:32609105	363	0.572281	9.03803	6.08248969606975e-18	1.14873301077089e-12
6:32620344	363	0.573197	9.03674	6.14266530374726e-18	1.15888295473728e-12
6:32620661	363	0.573375	9.02099	6.92818861894583e-18	1.30571353112803e-12
6:32607453	363	0.570891	8.99338	8.55234754874437e-18	1.61012464616363e-12
6:32607666	363	0.581713	8.99049	8.74247203999653e-18	1.64420073189377e-12
6:32453191	363	0.581125	8.98515	9.10545897142758e-18	1.7106821700423e-12
6:32638371	363	0.688097	8.98239	9.29919464872766e-18	1.74344417133531e-12
6:32639163	363	0.688091	8.98251	9.29070475705865e-18	1.74344417133531e-12
6:32635754	363	0.568213	8.9811	9.39103857846116e-18	1.75700675725775e-12
6:32635809	363	0.568213	8.9811	9.39103857846116e-18	1.75700675725775e-12
12:69727190	306	-0.380065	-9.05456	5.36026573196497e-18	1.82177799776424e-12
6:32663564	363	0.565482	8.96661	1.04854667869693e-17	1.95163458595913e-12
6:32663986	363	0.565482	8.96661	1.04854667869693e-17	1.95163458595913e-12
6:32664163	363	0.565482	8.96661	1.04854667869693e-17	1.95163458595913e-12
6:32664332	363	0.565482	8.96661	1.04854667869693e-17	1.95163458595913e-12
6:32664675	363	0.565482	8.96661	1.04854667869693e-17	1.95163458595913e-12
6:32622130	363	0.578292	8.95828	1.11706727939753e-17	2.07702463704821e-12
6:32588808	363	0.564769	8.95219	1.17003876631197e-17	2.17327463489255e-12
6:32363816	363	0.536966	8.94382	1.2467716563812e-17	2.3134162666085e-12
6:32494608	363	0.911958	8.93966	1.28682888210539e-17	2.38528693345938e-12
6:32631308	363	0.838262	8.93798	1.3032984153524e-17	2.41333227586501e-12
6:32633130	363	0.782962	8.9306	1.37836222164921e-17	2.54970830613831e-12
6:32613746	363	0.567475	8.9294	1.39096246962692e-17	2.57037738047576e-12
6:32627992	363	0.572906	8.92823	1.40336372628426e-17	2.59063675830148e-12
6:32668125	363	0.829787	8.92802	1.40560954033891e-17	2.5921267072382e-12
6:32443223	363	-0.571604	-8.92656	1.42124457814353e-17	2.61827983140068e-12
6:32624731	363	0.58503	8.92095	1.483044458751e-17	2.72933957813948e-12
12:69726850	476	0.376097	8.99784	8.26674468373496e-18	2.80222032160637e-12
6:32613712	363	0.565903	8.91702	1.52786528978928e-17	2.80895694958439e-12
6:32635338	363	0.781608	8.91128	1.59570834842402e-17	2.93069486950132e-12
6:32622256	363	0.567922	8.90964	1.61570054707466e-17	2.96439094824097e-12
6:32614080	363	0.564535	8.90795	1.63654821699849e-17	2.99958644027409e-12
6:32611788	363	1.48695	8.89332	1.82818065585003e-17	3.34741921784028e-12
6:32630798	363	0.788703	8.8813	2.00201194853218e-17	3.66198472878138e-12
6:32645766	363	0.650619	8.87679	2.07142523439983e-17	3.78510944847535e-12
6:32627818	363	0.833366	8.8627	2.30399390534784e-17	4.20581598700484e-12
6:32629549	363	0.712321	8.86228	2.31135194485165e-17	4.21497719566639e-12
12:69792102	476	0.370629	8.94362	1.24873509989086e-17	4.22181973254856e-12
6:32346452	363	0.536214	8.85812	2.38508920330658e-17	4.30586271937426e-12
6:32350868	363	0.536214	8.85812	2.38508920330658e-17	4.30586271937426e-12
6:32351283	363	0.536214	8.85812	2.38508920330658e-17	4.30586271937426e-12
6:32354428	363	0.536214	8.85812	2.38508920330658e-17	4.30586271937426e-12
6:32355605	363	0.536214	8.85812	2.38508920330658e-17	4.30586271937426e-12
6:32355683	363	0.536214	8.85812	2.38508920330658e-17	4.30586271937426e-12
6:32358942	363	0.536214	8.85812	2.38508920330658e-17	4.30586271937426e-12
6:32361111	363	0.536214	8.85812	2.38508920330658e-17	4.30586271937426e-12
6:32363527	363	0.536214	8.85812	2.38508920330658e-17	4.30586271937426e-12
6:32363955	363	0.536214	8.85812	2.38508920330658e-17	4.30586271937426e-12
6:32623430	363	0.572163	8.8566	2.41253553279401e-17	4.35105250997793e-12
6:32376788	363	0.542096	8.85286	2.48164200841857e-17	4.47121163119786e-12
6:32636063	363	0.686665	8.84887	2.55746191674633e-17	4.60321428304756e-12
6:32622238	363	0.561912	8.84712	2.59132208437468e-17	4.65950485953006e-12
6:32630620	363	0.721303	8.83253	2.89238804818984e-17	5.19567191649488e-12
12:69751434	476	0.361508	8.90597	1.66121094689516e-17	5.60168572287302e-12
6:32618493	363	0.772837	8.81935	3.19415647942727e-17	5.73203151527023e-12
6:32540041	363	0.727332	8.81237	3.36614066596303e-17	6.03465286564735e-12
6:32634094	363	0.861295	8.78636	4.0926768219965e-17	7.32985807191196e-12
6:32622103	363	0.561152	8.77088	4.59649116098711e-17	8.22399907856792e-12
6:32377830	363	0.670979	8.7637	4.85045279990313e-17	8.66977536346971e-12
6:32588882	363	0.542265	8.75785	5.06779282128762e-17	9.02244895553975e-12
6:32588985	363	0.542265	8.75785	5.06779282128762e-17	9.02244895553975e-12
6:32589158	363	0.542265	8.75785	5.06779282128762e-17	9.02244895553975e-12
6:32590234	363	0.542265	8.75785	5.06779282128762e-17	9.02244895553975e-12
6:32587782	363	0.542719	8.75668	5.11224268571547e-17	9.09260052368593e-12
6:32590331	363	0.542176	8.75531	5.16490167300272e-17	9.17720001752869e-12
6:32636351	363	0.674571	8.74832	5.44237580690482e-17	9.66069963245076e-12
6:32628297	363	0.560641	8.74621	5.52920813521112e-17	9.80517444422431e-12
12:69775772	476	-0.425149	-8.82372	3.09080898925558e-17	1.03413584341415e-11
12:69776083	476	-0.425149	-8.82372	3.09080898925558e-17	1.03413584341415e-11
12:69777615	476	-0.425149	-8.82372	3.09080898925558e-17	1.03413584341415e-11
6:32631237	363	0.802056	8.73738	5.90656805837107e-17	1.04640631949735e-11
12:69751434	105	-0.563786	-8.79488	3.83896199282293e-17	1.28113700747309e-11
6:32594457	363	-0.619249	-8.68383	8.80770823227543e-17	1.55730913029579e-11
6:32632425	363	0.742543	8.68351	8.82821855903611e-17	1.55940527461703e-11
6:32633373	363	0.823018	8.67542	9.37616660507815e-17	1.65457198970307e-11
6:32410941	363	0.5289	8.66595	1.00610748520923e-16	1.77196378075634e-11
6:32411035	363	0.5289	8.66595	1.00610748520923e-16	1.77196378075634e-11
6:32634679	363	0.646745	8.65811	1.06647462626679e-16	1.87644856568776e-11
6:32572290	363	0.564119	8.65733	1.07268363893283e-16	1.88553190489743e-11
6:32612396	363	0.551003	8.65583	1.08463208651199e-16	1.90467631554576e-11
6:32612488	363	0.550956	8.65527	1.08916529104712e-16	1.91077453004767e-11
6:32548008	363	1.48368	8.64886	1.14229645796347e-16	2.00203566416309e-11
12:69761996	105	-0.559233	-8.72245	6.60360152768959e-17	2.19242117095205e-11
12:69769538	105	-0.559252	-8.72278	6.58758957054329e-17	2.19242117095205e-11
6:32615458	363	0.550338	8.63611	1.25569518200363e-16	2.1986441640852e-11
6:32674573	363	0.554691	8.63032	1.31076562577488e-16	2.26426278949472e-11
6:32674643	363	0.554691	8.63032	1.31076562577488e-16	2.26426278949472e-11
6:32674649	363	0.554691	8.63032	1.31076562577488e-16	2.26426278949472e-11
6:32674700	363	0.554701	8.6305	1.30900192704372e-16	2.26426278949472e-11
6:32675109	363	0.554691	8.63032	1.31076562577488e-16	2.26426278949472e-11
6:32677190	363	0.554691	8.63032	1.31076562577488e-16	2.26426278949472e-11
6:32678136	363	0.554691	8.63032	1.31076562577488e-16	2.26426278949472e-11
6:32678182	363	0.554691	8.63032	1.31076562577488e-16	2.26426278949472e-11
6:32678199	363	0.554691	8.63032	1.31076562577488e-16	2.26426278949472e-11
6:32678477	363	0.554691	8.63032	1.31076562577488e-16	2.26426278949472e-11
6:32678597	363	0.554691	8.63032	1.31076562577488e-16	2.26426278949472e-11
6:32678867	363	0.554691	8.63032	1.31076562577488e-16	2.26426278949472e-11
6:32678999	363	0.554691	8.63032	1.31076562577488e-16	2.26426278949472e-11
6:32679146	363	0.554691	8.63032	1.31076562577488e-16	2.26426278949472e-11
6:32620549	363	2.03837	8.62883	1.32538467012098e-16	2.28732321927876e-11
6:32612336	363	0.553207	8.62561	1.35737585936414e-16	2.34029133631987e-11
12:69769436	476	-0.421072	-8.71273	7.1004867058517e-17	2.35134437901896e-11
6:32569056	363	0.566517	8.62231	1.39098822213687e-16	2.39595061629764e-11
12:69761996	476	0.353874	8.69495	8.10737132903891e-17	2.67107896290743e-11
12:69769538	476	0.353881	8.69514	8.09560148311272e-17	2.67107896290743e-11
6:32612343	363	0.550514	8.6023	1.61310338170442e-16	2.77588592107696e-11
12:69785926	105	-0.557038	-8.68896	8.47703499278283e-17	2.78576292824531e-11
6:32587165	363	-0.53553	-8.59674	1.68087028187415e-16	2.88974160296459e-11
6:32612034	363	0.555379	8.59403	1.71486482104076e-16	2.94537432892417e-11
6:32448561	363	0.658689	8.59377	1.7181359425228e-16	2.94818219017378e-11
6:32620469	363	0.549477	8.58702	1.80601398816418e-16	3.09602520712201e-11
6:32584625	363	0.548404	8.58592	1.82087404884029e-16	3.11853240200217e-11
12:69771468	476	-0.419682	-8.66776	9.92607128726926e-17	3.25367295359183e-11
6:32606941	363	0.542627	8.577	1.94480548818881e-16	3.32762129169241e-11
12:69753595	105	-0.556169	-8.66231	1.03366676959826e-16	3.37968472051216e-11
12:69753377	476	-0.419203	-8.65611	1.08242131534976e-16	3.49485429166908e-11
12:69755645	476	-0.419203	-8.65611	1.08242131534976e-16	3.49485429166908e-11
12:69773676	476	-0.419203	-8.65611	1.08242131534976e-16	3.49485429166908e-11
12:69773903	476	-0.419203	-8.65611	1.08242131534976e-16	3.49485429166908e-11
12:69782981	476	-0.419205	-8.65614	1.08214169140137e-16	3.49485429166908e-11
12:69713630	105	-0.568413	-8.65145	1.12058184625261e-16	3.60006430727863e-11
12:69715457	105	-0.568413	-8.65145	1.12058184625261e-16	3.60006430727863e-11
12:69786620	476	-0.418443	-8.64847	1.14557829711071e-16	3.67123732711413e-11
6:32628617	363	0.685896	8.55663	2.26023038233697e-16	3.86365368435699e-11
6:32628633	363	0.685706	8.55595	2.27156299329456e-16	3.87934513598456e-11
6:32624128	363	0.651749	8.551	2.35606742565204e-16	4.01985039944003e-11
12:69775118	476	0.347875	8.63574	1.25915051720862e-16	4.02521434956026e-11
12:69674595	105	-0.565903	-8.60966	1.52764682166934e-16	4.87147711593049e-11
12:69681101	105	-0.565908	-8.60928	1.53188440456755e-16	4.87295824895806e-11
12:69657145	105	-0.562003	-8.59881	1.65535012808692e-16	5.17645620744216e-11
12:69662929	105	-0.562005	-8.59881	1.65530977744367e-16	5.17645620744216e-11
12:69669703	105	-0.562005	-8.59881	1.65530977744367e-16	5.17645620744216e-11
12:69671158	105	-0.562005	-8.59881	1.65530977744367e-16	5.17645620744216e-11
12:69672060	105	-0.562005	-8.59881	1.65530977744367e-16	5.17645620744216e-11
12:69672471	105	-0.562005	-8.59881	1.65530977744367e-16	5.17645620744216e-11
12:69753595	476	0.350688	8.59902	1.65271343777771e-16	5.17645620744216e-11
6:32634139	363	0.689232	8.50528	3.29778153698454e-16	5.61063499708035e-11
12:69785926	476	0.349786	8.58349	1.85378274819945e-16	5.78297379320255e-11
6:32654502	363	0.81152	8.49465	3.5655601649411e-16	6.0490802566637e-11
6:32666173	363	0.81152	8.49465	3.5655601649411e-16	6.0490802566637e-11
6:32666295	363	0.81152	8.49465	3.5655601649411e-16	6.0490802566637e-11
12:69637847	105	-0.556911	-8.56501	2.12472551925121e-16	6.50254119546291e-11
12:69638610	105	-0.556911	-8.56501	2.12472551925121e-16	6.50254119546291e-11
12:69639207	105	-0.556911	-8.56501	2.12472551925121e-16	6.50254119546291e-11
12:69639215	105	-0.556911	-8.56501	2.12472551925121e-16	6.50254119546291e-11
12:69642315	105	-0.556911	-8.56501	2.12472551925121e-16	6.50254119546291e-11
12:69642683	105	-0.556911	-8.56501	2.12472551925121e-16	6.50254119546291e-11
12:69645864	105	-0.556911	-8.56501	2.12472551925121e-16	6.50254119546291e-11
12:69646010	105	-0.556911	-8.56501	2.12472551925121e-16	6.50254119546291e-11
12:69775118	105	-0.544401	-8.5637	2.14536107866677e-16	6.55017282811522e-11
12:69691087	105	-0.564071	-8.56326	2.15238723618317e-16	6.55612583394903e-11
6:32630689	363	0.752511	8.48268	3.89270512861944e-16	6.59787885306732e-11
6:32632469	363	0.67097	8.47571	4.09640359831058e-16	6.93009559542737e-11
12:69751432	476	-0.415576	-8.55529	2.28264278415553e-16	6.93652174711281e-11
12:69686203	105	-0.562921	-8.54871	2.39610859787524e-16	7.17995887149162e-11
12:69691134	105	-0.562885	-8.54898	2.39132046197038e-16	7.17995887149162e-11
12:69691806	105	-0.562869	-8.54879	2.39463547739263e-16	7.17995887149162e-11
12:69693172	105	-0.562869	-8.54879	2.39463547739263e-16	7.17995887149162e-11
12:69703754	105	-0.562869	-8.54879	2.39463547739263e-16	7.17995887149162e-11
12:69704747	105	-0.562869	-8.54879	2.39463547739263e-16	7.17995887149162e-11
12:69743071	476	-0.415129	-8.54612	2.44226288665643e-16	7.18489819317163e-11
12:69745182	476	-0.415129	-8.54612	2.44226288665643e-16	7.18489819317163e-11
12:69745363	476	-0.415129	-8.54612	2.44226288665643e-16	7.18489819317163e-11
12:69749623	476	-0.415129	-8.54612	2.44226288665643e-16	7.18489819317163e-11
12:69749755	476	-0.415129	-8.54612	2.44226288665643e-16	7.18489819317163e-11
12:69749990	476	-0.415129	-8.54612	2.44226288665643e-16	7.18489819317163e-11
12:69758945	476	-0.415137	-8.54627	2.4395340996791e-16	7.18489819317163e-11
12:69770312	476	-0.415129	-8.54612	2.44226288665643e-16	7.18489819317163e-11
6:32619632	363	0.599545	8.46959	4.28426948494531e-16	7.24111875709966e-11
12:69757931	306	-0.363946	-8.53639	2.62360770125298e-16	7.63147799128314e-11
12:69758884	306	-0.363946	-8.53639	2.62360770125298e-16	7.63147799128314e-11
12:69761444	306	-0.363946	-8.53639	2.62360770125298e-16	7.63147799128314e-11
12:69770147	306	-0.363946	-8.53639	2.62360770125298e-16	7.63147799128314e-11
12:69771073	306	-0.363946	-8.53639	2.62360770125298e-16	7.63147799128314e-11
6:32526731	363	0.558791	8.45898	4.63034501310591e-16	7.81870858977331e-11
6:32607218	363	1.36624	8.44768	5.02915171851878e-16	8.48417424019762e-11
12:69688073	105	-0.561418	-8.51308	3.11418156911257e-16	9.03808972045178e-11
6:32367795	363	0.508185	8.43844	5.38046319788924e-16	9.06834541682414e-11
6:32628389	363	0.678262	8.43778	5.40643794301996e-16	9.10360779299833e-11
6:32612339	363	0.541788	8.41618	6.32902066676204e-16	1.06377252893663e-10
6:32632145	363	1.01959	8.41618	6.32932595343916e-16	1.06377252893663e-10
6:32571903	363	0.558769	8.40571	6.83087042413325e-16	1.14699736311438e-10
12:69655167	105	-0.552151	-8.4757	4.0969284100325e-16	1.18635931769393e-10
6:32619096	363	0.782803	8.37952	8.26502513525695e-16	1.38651953087239e-10
12:69726883	476	-0.417743	-8.43224	5.62948223514806e-16	1.62334190577507e-10
12:69733190	476	-0.417748	-8.4322	5.63112651452179e-16	1.62334190577507e-10
6:32582577	363	0.528175	8.35032	1.02163571672655e-15	1.71227571661579e-10
12:69790780	306	-0.359725	-8.42147	6.0894630072059e-16	1.75156147583327e-10
6:32648156	363	0.563017	8.34219	1.08369108682056e-15	1.81459338893206e-10
6:32287496	363	0.517313	8.34075	1.09499740546446e-15	1.83182288800966e-10
6:32634090	363	0.736974	8.31762	1.29455991058114e-15	2.16366234628266e-10
6:32661294	363	0.536311	8.30414	1.42713347006079e-15	2.38302852642314e-10
6:32634646	363	0.714926	8.30158	1.45367012808916e-15	2.42509192113903e-10
6:32658327	363	0.536038	8.29967	1.47393622097934e-15	2.43188003514816e-10
6:32660375	363	0.536038	8.29967	1.47393622097934e-15	2.43188003514816e-10
6:32662904	363	0.536038	8.29967	1.47393622097934e-15	2.43188003514816e-10
6:32663606	363	0.536038	8.29967	1.47393622097934e-15	2.43188003514816e-10
6:32663925	363	0.536038	8.29967	1.47393622097934e-15	2.43188003514816e-10
6:32664458	363	0.536038	8.29967	1.47393622097934e-15	2.43188003514816e-10
6:32664880	363	0.536038	8.29967	1.47393622097934e-15	2.43188003514816e-10
6:32665086	363	0.536038	8.29967	1.47393622097934e-15	2.43188003514816e-10
6:32665285	363	0.536038	8.29967	1.47393622097934e-15	2.43188003514816e-10
6:32665367	363	0.536038	8.29967	1.47393622097934e-15	2.43188003514816e-10
6:32666397	363	0.536038	8.29967	1.47393622097934e-15	2.43188003514816e-10
6:32666738	363	0.536038	8.29967	1.47393622097934e-15	2.43188003514816e-10
6:32623580	363	0.666977	8.28704	1.61453377372646e-15	2.6614178573921e-10
6:32618190	363	0.765318	8.28429	1.64688906428933e-15	2.71227123442966e-10
6:32548178	363	0.539878	8.27497	1.76139883147035e-15	2.89820885446812e-10
6:32628736	363	0.541389	8.26662	1.87049435326632e-15	3.07490669132776e-10
6:32295694	363	0.512357	8.25567	2.02388802100709e-15	3.32403774454766e-10
12:69735285	476	-0.412381	-8.31961	1.27613546742723e-15	3.66249461223318e-10
12:69792102	306	-0.350199	-8.31852	1.28620113439358e-15	3.68319807996373e-10
6:32549782	363	0.54708	8.24037	2.25929949175489e-15	3.7072985280393e-10
6:32549726	363	0.54656	8.21834	2.64637264378355e-15	4.33849798716513e-10
6:32611590	363	0.525573	8.19946	3.02964852868741e-15	4.96233018078549e-10
6:32594470	363	-0.613758	-8.19661	3.09211474386773e-15	5.0600449734311e-10
6:32542844	363	0.612785	8.19067	3.22651357580471e-15	5.27518866354899e-10
20:53822721	84	-1.37974	-8.98734	8.9548041598458e-18	5.44792375476698e-10
6:32668323	363	0.527389	8.17856	3.51825290737024e-15	5.71071084414646e-10
6:32668336	363	0.527389	8.17856	3.51825290737024e-15	5.71071084414646e-10
6:32668713	363	0.527389	8.17856	3.51825290737024e-15	5.71071084414646e-10
6:32670308	363	0.527389	8.17856	3.51825290737024e-15	5.71071084414646e-10
6:32670464	363	0.527389	8.17856	3.51825290737024e-15	5.71071084414646e-10
6:32670897	363	0.527389	8.17856	3.51825290737024e-15	5.71071084414646e-10
6:32671765	363	0.527389	8.17856	3.51825290737024e-15	5.71071084414646e-10
6:32674952	363	0.527389	8.17856	3.51825290737024e-15	5.71071084414646e-10
6:32522576	363	0.523736	8.17526	3.60238790127981e-15	5.84201288708763e-10
6:32602396	363	-0.524955	-8.16537	3.8660456861052e-15	6.26395009293259e-10
6:32557163	363	1.52728	8.1581	4.07195160816139e-15	6.59164087304447e-10
6:32427179	363	0.540739	8.15717	4.09895629488913e-15	6.62939949806658e-10
6:32605525	363	0.533508	8.15537	4.15207685132421e-15	6.70929071227229e-10
6:32286680	363	0.495262	8.14078	4.60707802256268e-15	7.33920564051417e-10
6:32286984	363	0.495262	8.14078	4.60707802256268e-15	7.33920564051417e-10
6:32288190	363	0.495262	8.14078	4.60707802256268e-15	7.33920564051417e-10
6:32288564	363	0.495262	8.14078	4.60707802256268e-15	7.33920564051417e-10
6:32288805	363	0.495262	8.14078	4.60707802256268e-15	7.33920564051417e-10
6:32289318	363	0.495262	8.14078	4.60707802256268e-15	7.33920564051417e-10
6:32292084	363	0.495262	8.14078	4.60707802256268e-15	7.33920564051417e-10
6:32293434	363	0.495262	8.14078	4.60707802256268e-15	7.33920564051417e-10
6:32295357	363	0.495262	8.14078	4.60707802256268e-15	7.33920564051417e-10
6:32296780	363	0.495262	8.14078	4.60707802256268e-15	7.33920564051417e-10
6:32296842	363	0.495262	8.14078	4.60707802256268e-15	7.33920564051417e-10
6:32300848	363	0.495262	8.14078	4.60707802256268e-15	7.33920564051417e-10
6:32301289	363	0.495262	8.14078	4.60707802256268e-15	7.33920564051417e-10
6:32301452	363	0.495262	8.14078	4.60707802256268e-15	7.33920564051417e-10
6:32303511	363	0.495262	8.14078	4.60707802256268e-15	7.33920564051417e-10
6:32307260	363	0.495262	8.14078	4.60707802256268e-15	7.33920564051417e-10
6:32634098	363	0.758021	8.13598	4.76750037264093e-15	7.58805382852717e-10
6:32619188	363	0.588372	8.12745	5.0657425424451e-15	8.04852233232934e-10
6:32625209	363	0.572392	8.12754	5.06251864766984e-15	8.04852233232934e-10
12:69726850	306	-0.349422	-8.20502	2.91152768412996e-15	8.31907842127307e-10
6:32576731	363	0.536061	8.12103	5.30269243863353e-15	8.41756872869834e-10
6:32667958	363	0.521589	8.11047	5.71617996245507e-15	9.06595702557635e-10
6:32293598	363	0.49487	8.09477	6.39021098275539e-15	1.01260677051848e-9
6:32571873	363	0.549452	8.0868	6.76177416873814e-15	1.07054393202355e-9
6:32540285	363	0.755237	8.08119	7.03617588220402e-15	1.11300997626034e-9
6:32520907	363	0.515539	8.04661	8.98719147485269e-15	1.42038225334335e-9
6:32675645	363	0.890415	8.04151	9.31710788742945e-15	1.47123339503944e-9
6:32667280	363	0.522846	8.0337	9.84539558968084e-15	1.55329219919981e-9
6:32418018	363	0.531284	8.01781	1.10128064862393e-14	1.72989874789491e-9
6:32418031	363	0.531284	8.01781	1.10128064862393e-14	1.72989874789491e-9
6:32418710	363	0.531284	8.01781	1.10128064862393e-14	1.72989874789491e-9
6:32424568	363	0.531284	8.01781	1.10128064862393e-14	1.72989874789491e-9
6:32424882	363	0.531284	8.01781	1.10128064862393e-14	1.72989874789491e-9
6:32550426	363	0.533304	8.01681	1.10911570859201e-14	1.74068850949987e-9
6:32550501	363	0.528923	8.00823	1.17818951813548e-14	1.84748627299171e-9
6:32558946	363	0.532195	8.00471	1.20774342467821e-14	1.8921821255601e-9
6:32550012	363	-0.655996	-8.0002	1.24674532902948e-14	1.95158971372055e-9
6:32619694	363	0.736986	7.99484	1.29461800022723e-14	2.02476794295087e-9
6:32636757	363	0.519367	7.98481	1.38926337936677e-14	2.17090777931986e-9
6:32425487	363	0.52907	7.97418	1.49700894709185e-14	2.33724737877782e-9
6:32576687	363	0.524777	7.97201	1.52001656133553e-14	2.37111397299277e-9
6:32667762	363	0.518995	7.96918	1.55047974287011e-14	2.41654205010832e-9
6:32511725	363	0.508233	7.96031	1.65001287903845e-14	2.5694493987526e-9
6:32231014	363	0.485788	7.93513	1.96836187677564e-14	2.75685000385771e-9
6:32233547	363	0.485809	7.93537	1.96507080042487e-14	2.75685000385771e-9
6:32248166	363	0.487408	7.9376	1.93465837109764e-14	2.75685000385771e-9
6:32248364	363	0.485809	7.93537	1.96507080042487e-14	2.75685000385771e-9
6:32252274	363	0.485809	7.93537	1.96507080042487e-14	2.75685000385771e-9
6:32254225	363	0.487408	7.9376	1.93465837109764e-14	2.75685000385771e-9
6:32254654	363	0.485809	7.93537	1.96507080042487e-14	2.75685000385771e-9
6:32256132	363	0.487408	7.9376	1.93465837109764e-14	2.75685000385771e-9
6:32257337	363	0.485809	7.93537	1.96507080042487e-14	2.75685000385771e-9
6:32260559	363	0.485809	7.93537	1.96507080042487e-14	2.75685000385771e-9
6:32261771	363	0.487408	7.9376	1.93465837109764e-14	2.75685000385771e-9
6:32265710	363	0.485809	7.93537	1.96507080042487e-14	2.75685000385771e-9
6:32266535	363	0.487428	7.93772	1.93294473396503e-14	2.75685000385771e-9
6:32268980	363	0.485812	7.93532	1.96568135300729e-14	2.75685000385771e-9
6:32270500	363	0.487408	7.9376	1.93465837109764e-14	2.75685000385771e-9
6:32273158	363	0.485809	7.93537	1.96507080042487e-14	2.75685000385771e-9
6:32275555	363	0.486209	7.94093	1.89009027054993e-14	2.75685000385771e-9
6:32276502	363	0.485809	7.93537	1.96507080042487e-14	2.75685000385771e-9
6:32278266	363	0.485809	7.93537	1.96507080042487e-14	2.75685000385771e-9
6:32282033	363	0.48584	7.93619	1.95384921207208e-14	2.75685000385771e-9
6:32284423	363	0.485809	7.93537	1.96507080042487e-14	2.75685000385771e-9
6:32284950	363	0.485809	7.93537	1.96507080042487e-14	2.75685000385771e-9
6:32286102	363	0.485809	7.93537	1.96507080042487e-14	2.75685000385771e-9
6:32287329	363	0.48595	7.93725	1.93929079678751e-14	2.75685000385771e-9
6:32288041	363	0.485809	7.93537	1.96507080042487e-14	2.75685000385771e-9
6:32288462	363	0.485809	7.93537	1.96507080042487e-14	2.75685000385771e-9
6:32288932	363	0.485809	7.93537	1.96507080042487e-14	2.75685000385771e-9
6:32289240	363	0.487408	7.9376	1.93465837109764e-14	2.75685000385771e-9
6:32289764	363	0.485809	7.93537	1.96507080042487e-14	2.75685000385771e-9
6:32290748	363	0.485809	7.93537	1.96507080042487e-14	2.75685000385771e-9
6:32290954	363	0.485809	7.93537	1.96507080042487e-14	2.75685000385771e-9
6:32291837	363	0.485809	7.93537	1.96507080042487e-14	2.75685000385771e-9
6:32292715	363	0.485809	7.93537	1.96507080042487e-14	2.75685000385771e-9
6:32294566	363	0.485809	7.93537	1.96507080042487e-14	2.75685000385771e-9
6:32294712	363	0.485809	7.93537	1.96507080042487e-14	2.75685000385771e-9
6:32294843	363	0.485809	7.93537	1.96507080042487e-14	2.75685000385771e-9
6:32294992	363	0.485809	7.93537	1.96507080042487e-14	2.75685000385771e-9
6:32295350	363	0.485809	7.93537	1.96507080042487e-14	2.75685000385771e-9
6:32295553	363	0.485809	7.93537	1.96507080042487e-14	2.75685000385771e-9
6:32295828	363	0.485809	7.93537	1.96507080042487e-14	2.75685000385771e-9
6:32296316	363	0.485809	7.93537	1.96507080042487e-14	2.75685000385771e-9
6:32296375	363	0.485809	7.93537	1.96507080042487e-14	2.75685000385771e-9
6:32296555	363	0.485809	7.93537	1.96507080042487e-14	2.75685000385771e-9
6:32297124	363	0.485809	7.93537	1.96507080042487e-14	2.75685000385771e-9
6:32297156	363	0.485809	7.93537	1.96507080042487e-14	2.75685000385771e-9
6:32297328	363	0.485809	7.93537	1.96507080042487e-14	2.75685000385771e-9
6:32297337	363	0.485809	7.93537	1.96507080042487e-14	2.75685000385771e-9
6:32297417	363	0.485809	7.93537	1.96507080042487e-14	2.75685000385771e-9
6:32297690	363	0.485809	7.93537	1.96507080042487e-14	2.75685000385771e-9
6:32297955	363	0.485809	7.93537	1.96507080042487e-14	2.75685000385771e-9
6:32298372	363	0.485809	7.93537	1.96507080042487e-14	2.75685000385771e-9
6:32299715	363	0.485809	7.93537	1.96507080042487e-14	2.75685000385771e-9
6:32299873	363	0.485809	7.93537	1.96507080042487e-14	2.75685000385771e-9
6:32300374	363	0.485801	7.93523	1.96693575681909e-14	2.75685000385771e-9
6:32300470	363	0.485809	7.93537	1.96507080042487e-14	2.75685000385771e-9
6:32301322	363	0.485809	7.93537	1.96507080042487e-14	2.75685000385771e-9
6:32301514	363	0.485809	7.93537	1.96507080042487e-14	2.75685000385771e-9
6:32301804	363	0.485809	7.93537	1.96507080042487e-14	2.75685000385771e-9
6:32302045	363	0.485809	7.93537	1.96507080042487e-14	2.75685000385771e-9
6:32302067	363	0.485809	7.93537	1.96507080042487e-14	2.75685000385771e-9
6:32302728	363	0.485809	7.93537	1.96507080042487e-14	2.75685000385771e-9
6:32302741	363	0.485809	7.93537	1.96507080042487e-14	2.75685000385771e-9
6:32302757	363	0.485809	7.93537	1.96507080042487e-14	2.75685000385771e-9
6:32303068	363	0.485809	7.93537	1.96507080042487e-14	2.75685000385771e-9
6:32304031	363	0.485809	7.93537	1.96507080042487e-14	2.75685000385771e-9
6:32304222	363	0.485809	7.93537	1.96507080042487e-14	2.75685000385771e-9
6:32305029	363	0.485809	7.93537	1.96507080042487e-14	2.75685000385771e-9
6:32305125	363	0.485809	7.93537	1.96507080042487e-14	2.75685000385771e-9
6:32305142	363	0.486316	7.93484	1.9722955381906e-14	2.75685000385771e-9
6:32305143	363	0.486315	7.93487	1.97197956660996e-14	2.75685000385771e-9
6:32305370	363	0.485809	7.93537	1.96507080042487e-14	2.75685000385771e-9
6:32305690	363	0.485809	7.93537	1.96507080042487e-14	2.75685000385771e-9
6:32306022	363	0.485809	7.93537	1.96507080042487e-14	2.75685000385771e-9
6:32306262	363	0.485809	7.93537	1.96507080042487e-14	2.75685000385771e-9
6:32307137	363	0.485809	7.93537	1.96507080042487e-14	2.75685000385771e-9
6:32307382	363	0.485809	7.93537	1.96507080042487e-14	2.75685000385771e-9
6:32307869	363	0.485809	7.93537	1.96507080042487e-14	2.75685000385771e-9
6:32308062	363	0.485809	7.93537	1.96507080042487e-14	2.75685000385771e-9
6:32308106	363	0.485809	7.93537	1.96507080042487e-14	2.75685000385771e-9
6:32308345	363	0.485809	7.93537	1.96507080042487e-14	2.75685000385771e-9
6:32308642	363	0.485809	7.93537	1.96507080042487e-14	2.75685000385771e-9
6:32308690	363	0.485813	7.93529	1.96615361399872e-14	2.75685000385771e-9
6:32309296	363	0.485809	7.93537	1.96507080042487e-14	2.75685000385771e-9
6:32309352	363	0.485809	7.93537	1.96507080042487e-14	2.75685000385771e-9
6:32309434	363	0.485809	7.93537	1.96507080042487e-14	2.75685000385771e-9
6:32309864	363	0.485809	7.93537	1.96507080042487e-14	2.75685000385771e-9
6:32310103	363	0.485809	7.93537	1.96507080042487e-14	2.75685000385771e-9
6:32310684	363	0.485809	7.93537	1.96507080042487e-14	2.75685000385771e-9
6:32310803	363	0.485809	7.93537	1.96507080042487e-14	2.75685000385771e-9
6:32310967	363	0.485809	7.93537	1.96507080042487e-14	2.75685000385771e-9
6:32310986	363	0.485809	7.93537	1.96507080042487e-14	2.75685000385771e-9
6:32311148	363	0.485809	7.93537	1.96507080042487e-14	2.75685000385771e-9
6:32311871	363	0.485809	7.93537	1.96507080042487e-14	2.75685000385771e-9
6:32312740	363	0.485809	7.93537	1.96507080042487e-14	2.75685000385771e-9
6:32312796	363	0.485809	7.93537	1.96507080042487e-14	2.75685000385771e-9
6:32312883	363	0.485809	7.93537	1.96507080042487e-14	2.75685000385771e-9
6:32313097	363	0.485809	7.93537	1.96507080042487e-14	2.75685000385771e-9
6:32313136	363	0.485809	7.93537	1.96507080042487e-14	2.75685000385771e-9
6:32313143	363	0.485809	7.93537	1.96507080042487e-14	2.75685000385771e-9
6:32313461	363	0.485809	7.93537	1.96507080042487e-14	2.75685000385771e-9
6:32314676	363	0.485809	7.93537	1.96507080042487e-14	2.75685000385771e-9
6:32315173	363	0.485809	7.93537	1.96507080042487e-14	2.75685000385771e-9
6:32315216	363	0.485809	7.93537	1.96507080042487e-14	2.75685000385771e-9
6:32315557	363	0.485809	7.93537	1.96507080042487e-14	2.75685000385771e-9
6:32315593	363	0.485809	7.93537	1.96507080042487e-14	2.75685000385771e-9
6:32317127	363	0.485809	7.93537	1.96507080042487e-14	2.75685000385771e-9
6:32317215	363	0.485809	7.93537	1.96507080042487e-14	2.75685000385771e-9
6:32317276	363	0.487408	7.9376	1.93465837109764e-14	2.75685000385771e-9
6:32317471	363	0.485809	7.93537	1.96507080042487e-14	2.75685000385771e-9
6:32318036	363	0.487408	7.9376	1.93465837109764e-14	2.75685000385771e-9
6:32318729	363	0.485809	7.93537	1.96507080042487e-14	2.75685000385771e-9
6:32330153	363	0.485809	7.93537	1.96507080042487e-14	2.75685000385771e-9
6:32330651	363	0.485809	7.93537	1.96507080042487e-14	2.75685000385771e-9
6:32331069	363	0.485809	7.93537	1.96507080042487e-14	2.75685000385771e-9
6:32331429	363	0.485809	7.93537	1.96507080042487e-14	2.75685000385771e-9
6:32331824	363	0.485809	7.93537	1.96507080042487e-14	2.75685000385771e-9
6:32331837	363	0.485809	7.93537	1.96507080042487e-14	2.75685000385771e-9
6:32331841	363	0.485809	7.93537	1.96507080042487e-14	2.75685000385771e-9
6:32331927	363	0.485809	7.93537	1.96507080042487e-14	2.75685000385771e-9
6:32332996	363	0.485809	7.93537	1.96507080042487e-14	2.75685000385771e-9
6:32333410	363	0.485809	7.93537	1.96507080042487e-14	2.75685000385771e-9
6:32333955	363	0.485809	7.93537	1.96507080042487e-14	2.75685000385771e-9
6:32334224	363	0.485809	7.93537	1.96507080042487e-14	2.75685000385771e-9
6:32334258	363	0.485809	7.93537	1.96507080042487e-14	2.75685000385771e-9
6:32334489	363	0.485809	7.93537	1.96507080042487e-14	2.75685000385771e-9
6:32336074	363	0.485809	7.93537	1.96507080042487e-14	2.75685000385771e-9
6:32336586	363	0.485809	7.93537	1.96507080042487e-14	2.75685000385771e-9
6:32337234	363	0.485809	7.93537	1.96507080042487e-14	2.75685000385771e-9
6:32337367	363	0.485809	7.93537	1.96507080042487e-14	2.75685000385771e-9
6:32338386	363	0.485809	7.93537	1.96507080042487e-14	2.75685000385771e-9
6:32576717	363	0.526051	7.93484	1.97233172559067e-14	2.75685000385771e-9
6:32634795	363	0.530366	7.94636	1.81948460829623e-14	2.75685000385771e-9
6:32302539	363	0.48597	7.93353	1.9905461374916e-14	2.7779990969099e-9
6:32302541	363	0.48597	7.93353	1.9905461374916e-14	2.7779990969099e-9
6:32298648	363	0.485625	7.92936	2.04935772559973e-14	2.85786265834281e-9
6:32296029	363	0.488069	7.92192	2.15878741640982e-14	3.00581118234685e-9
6:32296057	363	0.488069	7.92192	2.15878741640982e-14	3.00581118234685e-9
6:32616868	363	0.687371	7.91846	2.21174877397271e-14	3.07717447281718e-9
6:32326531	363	0.486266	7.91563	2.25593458416336e-14	3.1362277618101e-9
6:32653972	363	0.577756	7.90992	2.3475530706982e-14	3.258568244047e-9
6:32654147	363	0.577756	7.90992	2.3475530706982e-14	3.258568244047e-9
6:32570667	363	0.524104	7.90516	2.42699597683617e-14	3.36624715658613e-9
6:32636866	363	0.515966	7.89367	2.62937902846253e-14	3.64414741251259e-9
6:32571876	363	0.544571	7.89213	2.65779975415961e-14	3.68070536822881e-9
6:32234953	363	0.483801	7.87715	2.95025989453171e-14	4.08258641004316e-9
12:69724909	105	-0.501184	-7.97018	1.53966682930818e-14	4.38956293977343e-9
6:32609813	363	0.512201	7.85308	3.48762874935757e-14	4.8224965711042e-9
6:32566021	363	-0.51113	-7.83961	3.82971806477803e-14	5.29145742567603e-9
6:32560327	363	0.518861	7.8315	4.05121616030539e-14	5.593208371084e-9
6:32238266	363	0.481445	7.8265	4.19386577696572e-14	5.78572042752357e-9
6:32659435	363	0.510781	7.82637	4.19772521753919e-14	5.78661399412289e-9
6:32498558	363	0.692705	7.82624	4.20163649815109e-14	5.78757760188554e-9
6:32238802	363	0.481299	7.82361	4.27890232567563e-14	5.88500954481272e-9
6:32239558	363	0.481299	7.82361	4.27890232567563e-14	5.88500954481272e-9
6:32561093	363	-0.487477	-7.82203	4.3257870323792e-14	5.94495452558588e-9
6:32308734	363	0.483896	7.81958	4.39980495254125e-14	6.04201404946208e-9
6:32308770	363	0.483891	7.81948	4.40311838828211e-14	6.04201404946208e-9
6:32561390	363	-0.487161	-7.81777	4.4554680521264e-14	6.1091960590083e-9
6:32560440	363	-0.486991	-7.81562	4.52235729852396e-14	6.19148858670979e-9
6:32649676	363	0.513216	7.81571	4.51932288043011e-14	6.19148858670979e-9
6:32293671	363	0.482134	7.8132	4.59872888096919e-14	6.2912671266328e-9
6:32572435	363	0.504856	7.79034	5.3861912739421e-14	7.36296025123716e-9
6:32609181	363	0.719056	7.78317	5.65929007703075e-14	7.7304229121588e-9
6:32309003	363	0.487266	7.77803	5.86383632633729e-14	8.00375898992939e-9
6:32268501	363	0.492092	7.77643	5.92882670482018e-14	8.08634065592361e-9
12:69776183	476	-0.371743	-7.88213	2.849639219241e-14	8.08856000759046e-9
12:69776299	476	-0.371743	-7.88213	2.849639219241e-14	8.08856000759046e-9
6:32556378	363	-0.557616	-7.76676	6.33745559376231e-14	8.63713222777266e-9
6:32560757	363	-0.512526	-7.76571	6.38362643133705e-14	8.69348110032988e-9
6:32559864	363	-0.485768	-7.7369	7.78339524593254e-14	1.05917371340826e-8
6:32577784	363	0.510465	7.73493	7.88971139542113e-14	1.07207667397381e-8
6:32577785	363	0.510466	7.73492	7.89011397301614e-14	1.07207667397381e-8
6:32625952	363	0.505621	7.73268	8.01250798064365e-14	1.08788664780297e-8
6:32451650	363	0.5304	7.71951	8.77091696180017e-14	1.18996179622212e-8
6:32578127	363	0.508274	7.71054	9.32737978054457e-14	1.26450564795364e-8
6:32669018	363	0.505336	7.70447	9.72340516421108e-14	1.3152255957535e-8
6:32676251	363	0.505336	7.70447	9.72340516421108e-14	1.3152255957535e-8
6:32681631	363	0.505344	7.70457	9.7171514465119e-14	1.3152255957535e-8
6:32561123	363	-0.481145	-7.70032	1.00040200852725e-13	1.35216752047538e-8
6:32556461	363	1.09789	7.68265	1.12898153366787e-13	1.52481481554153e-8
6:31604355	363	1.09842	7.67703	1.17322000911744e-13	1.58337684548841e-8
6:32114515	363	0.547043	7.66149	1.30454124251562e-13	1.75929006344239e-8
6:32607728	363	-0.571845	-7.65505	1.36313325906797e-13	1.83693166780976e-8
12:69786620	306	0.382632	7.752	7.01550616254133e-14	1.98694980951564e-8
6:32644341	363	0.868471	7.63181	1.59696932382332e-13	2.1504361623859e-8
6:32409242	363	-0.484835	-7.62324	1.69286431841661e-13	2.27786335732337e-8
12:69673106	476	-0.372807	-7.71992	8.74635654861387e-14	2.39319401498985e-8
12:69674537	476	-0.372813	-7.7201	8.73545961840714e-14	2.39319401498985e-8
12:69674913	476	-0.372814	-7.7201	8.7354788239698e-14	2.39319401498985e-8
12:69706865	476	-0.372813	-7.7201	8.73545961840714e-14	2.39319401498985e-8
12:69707235	476	-0.372813	-7.7201	8.73545961840714e-14	2.39319401498985e-8
12:69707579	476	-0.372813	-7.7201	8.73545961840714e-14	2.39319401498985e-8
12:69707841	476	-0.372813	-7.7201	8.73545961840714e-14	2.39319401498985e-8
12:69709312	476	-0.372813	-7.7201	8.73545961840714e-14	2.39319401498985e-8
12:69709610	476	-0.372813	-7.7201	8.73545961840714e-14	2.39319401498985e-8
12:69710398	476	-0.372813	-7.7201	8.73545961840714e-14	2.39319401498985e-8
12:69710544	476	-0.372813	-7.7201	8.73545961840714e-14	2.39319401498985e-8
12:69714813	476	-0.372813	-7.7201	8.73545961840714e-14	2.39319401498985e-8
12:69715336	476	-0.372813	-7.7201	8.73545961840714e-14	2.39319401498985e-8
12:69721061	476	-0.372813	-7.7201	8.73545961840714e-14	2.39319401498985e-8
12:69723566	476	-0.372813	-7.7201	8.73545961840714e-14	2.39319401498985e-8
12:69723709	476	-0.372813	-7.7201	8.73545961840714e-14	2.39319401498985e-8
6:32213052	363	0.524368	7.61137	1.83507640234546e-13	2.46737662705362e-8
6:31873292	363	1.0928	7.61057	1.84506164131007e-13	2.47895244971885e-8
6:31864674	363	1.09283	7.61014	1.85048667602658e-13	2.48438867473713e-8
12:69703612	476	-0.372587	-7.71137	9.27451200265026e-14	2.53234373760313e-8
6:31583841	363	1.10024	7.58377	2.21291473588068e-13	2.9687577612489e-8
12:69683596	476	-0.370836	-7.68441	1.11544809975612e-13	2.9703002960712e-8
12:69683669	476	-0.370836	-7.68441	1.11544809975612e-13	2.9703002960712e-8
12:69684528	476	-0.370836	-7.68441	1.11544809975612e-13	2.9703002960712e-8
12:69685031	476	-0.370836	-7.68441	1.11544809975612e-13	2.9703002960712e-8
12:69687325	476	-0.370836	-7.68441	1.11544809975612e-13	2.9703002960712e-8
12:69687955	476	-0.370836	-7.68441	1.11544809975612e-13	2.9703002960712e-8
12:69689022	476	-0.370836	-7.68441	1.11544809975612e-13	2.9703002960712e-8
12:69691074	476	-0.370833	-7.68443	1.11528730919332e-13	2.9703002960712e-8
12:69694675	476	-0.370836	-7.68441	1.11544809975612e-13	2.9703002960712e-8
12:69695231	476	-0.370836	-7.68441	1.11544809975612e-13	2.9703002960712e-8
12:69698618	476	-0.370836	-7.68441	1.11544809975612e-13	2.9703002960712e-8
12:69699873	476	-0.370836	-7.68441	1.11544809975612e-13	2.9703002960712e-8
6:32572975	363	0.504619	7.57742	2.31015749535662e-13	3.09690878850182e-8
6:32309323	363	0.469057	7.57365	2.36981418973069e-13	3.17452027721237e-8
6:32055486	363	1.08449	7.56868	2.45092797481177e-13	3.28073825864635e-8
6:32583046	363	0.487364	7.56295	2.5477504131056e-13	3.40781004866263e-8
12:69753377	306	0.378033	7.63636	1.54831047081727e-13	4.08088822756767e-8
12:69755645	306	0.378033	7.63636	1.54831047081727e-13	4.08088822756767e-8
12:69773676	306	0.378033	7.63636	1.54831047081727e-13	4.08088822756767e-8
12:69773903	306	0.378033	7.63636	1.54831047081727e-13	4.08088822756767e-8
12:69782981	306	0.378041	7.63651	1.54671206996642e-13	4.08088822756767e-8
6:32583328	363	-0.484513	-7.52823	3.22049046354818e-13	4.3044554714627e-8
6:32514144	363	-0.467512	-7.52508	3.28954902955341e-13	4.39349876188422e-8
6:32549313	363	-0.49452	-7.51504	3.51972531682769e-13	4.69743844385793e-8
6:32570055	363	0.498481	7.51364	3.55311406653498e-13	4.73848920087867e-8
6:32583194	363	0.4848	7.5116	3.60207786622832e-13	4.80023500203518e-8
6:32559541	363	0.497567	7.50077	3.87417513760036e-13	5.1590239896834e-8
6:32586908	363	0.497925	7.49406	4.05277244445235e-13	5.39286625166652e-8
12:69743071	306	0.376437	7.59018	2.11888535236237e-13	5.48402773176199e-8
12:69745182	306	0.376437	7.59018	2.11888535236237e-13	5.48402773176199e-8
12:69745363	306	0.376437	7.59018	2.11888535236237e-13	5.48402773176199e-8
12:69749623	306	0.376437	7.59018	2.11888535236237e-13	5.48402773176199e-8
12:69749755	306	0.376437	7.59018	2.11888535236237e-13	5.48402773176199e-8
12:69749990	306	0.376437	7.59018	2.11888535236237e-13	5.48402773176199e-8
12:69751432	306	0.376565	7.59172	2.09678693096987e-13	5.48402773176199e-8
12:69758945	306	0.376441	7.59026	2.11770390192786e-13	5.48402773176199e-8
12:69770312	306	0.376437	7.59018	2.11888535236237e-13	5.48402773176199e-8
6:32572326	363	0.497454	7.49103	4.1360963962905e-13	5.49968038276203e-8
12:69771468	306	0.375728	7.58332	2.21970254468665e-13	5.73346947590017e-8
6:32577220	363	0.496946	7.47689	4.54789713528414e-13	6.04278354505786e-8
12:69792216	476	-0.329677	-7.5746	2.35461504395275e-13	6.06980749738475e-8
12:69775772	306	0.373984	7.56149	2.57302019670022e-13	6.59333872805029e-8
12:69776083	306	0.373984	7.56149	2.57302019670022e-13	6.59333872805029e-8
12:69777615	306	0.373984	7.56149	2.57302019670022e-13	6.59333872805029e-8
6:32607325	363	-0.543125	-7.44642	5.57686304576016e-13	7.40450832902856e-8
6:32519391	363	-0.519973	-7.44331	5.69385256263885e-13	7.55427067002567e-8
6:32574703	363	0.494182	7.43859	5.87647784037302e-13	7.7908302223456e-8
6:32578230	363	0.494438	7.4378	5.90749426080981e-13	7.8261919280257e-8
6:32633852	363	0.533954	7.43547	6.00022566416225e-13	7.94320101580168e-8
6:32577224	363	0.494022	7.43446	6.04050598136115e-13	7.9906536227666e-8
6:32124424	363	1.06982	7.42685	6.35544377010855e-13	8.39494015561667e-8
6:32147157	363	1.06954	7.42694	6.35177790103189e-13	8.39494015561667e-8
6:32135137	363	1.06967	7.42644	6.37282709030691e-13	8.41173491649254e-8
6:32154711	363	1.06969	7.42607	6.38847773324651e-13	8.42621973583911e-8
6:32169145	363	1.06909	7.42582	6.39928407807128e-13	8.43429854624886e-8
6:32546866	363	0.512355	7.42226	6.55301920028258e-13	8.63060890967626e-8
6:32412571	363	0.582885	7.41855	6.7172847728909e-13	8.84049140583574e-8
6:32612655	363	0.484598	7.41719	6.77827550141325e-13	8.9142486460064e-8
12:69676696	476	-0.366854	-7.51538	3.51171147142228e-13	8.97811173922661e-8
12:69769436	306	0.372356	7.51513	3.51757036616376e-13	8.97811173922661e-8
12:69633070	476	-0.364102	-7.504	3.79086862218977e-13	9.42591350284469e-8
12:69638082	476	-0.364097	-7.50384	3.79519473283229e-13	9.42591350284469e-8
12:69639145	476	-0.364097	-7.50384	3.79519473283229e-13	9.42591350284469e-8
12:69639679	476	-0.364097	-7.50384	3.79519473283229e-13	9.42591350284469e-8
12:69644051	476	-0.364097	-7.50384	3.79519473283229e-13	9.42591350284469e-8
12:69645566	476	-0.364097	-7.50384	3.79519473283229e-13	9.42591350284469e-8
12:69648246	476	-0.364097	-7.50384	3.79519473283229e-13	9.42591350284469e-8
12:69648328	476	-0.364097	-7.50384	3.79519473283229e-13	9.42591350284469e-8
12:69659678	476	-0.364178	-7.50534	3.75705666685383e-13	9.42591350284469e-8
12:69663047	476	-0.364097	-7.50384	3.79519473283229e-13	9.42591350284469e-8
12:69668764	476	-0.364097	-7.50384	3.79519473283229e-13	9.42591350284469e-8
12:69669316	476	-0.364097	-7.50384	3.79519473283229e-13	9.42591350284469e-8
12:69670504	476	-0.364097	-7.50384	3.79519473283229e-13	9.42591350284469e-8
12:69671115	476	-0.364097	-7.50384	3.79519473283229e-13	9.42591350284469e-8
6:32612601	363	0.499	7.39717	7.74510508510994e-13	1.01783165633981e-7
6:32583063	363	0.486548	7.39005	8.12059767387176e-13	1.06639960918221e-7
6:32592166	363	0.526518	7.3894	8.15576803341308e-13	1.07023813563881e-7
6:32020961	363	1.01634	7.38441	8.43050658198922e-13	1.10548545606759e-7
6:32559764	363	0.489745	7.37542	8.94905117991305e-13	1.1096792668009e-7
6:32560501	363	0.489745	7.37542	8.94905117991305e-13	1.1096792668009e-7
6:32561277	363	0.489745	7.37542	8.94905117991305e-13	1.1096792668009e-7
6:32561305	363	0.489745	7.37542	8.94905117991305e-13	1.1096792668009e-7
6:32565329	363	0.489762	7.37562	8.93714547902069e-13	1.1096792668009e-7
6:32565413	363	0.490124	7.38087	8.63095547141941e-13	1.1096792668009e-7
6:32565854	363	0.489745	7.37542	8.94905117991305e-13	1.1096792668009e-7
6:32569556	363	0.489745	7.37542	8.94905117991305e-13	1.1096792668009e-7
6:32569608	363	0.49052	7.38038	8.65923466192747e-13	1.1096792668009e-7
6:32569790	363	0.489745	7.37542	8.94905117991305e-13	1.1096792668009e-7
6:32569879	363	0.489745	7.37542	8.94905117991305e-13	1.1096792668009e-7
6:32569911	363	0.489745	7.37542	8.94905117991305e-13	1.1096792668009e-7
6:32570325	363	0.489745	7.37542	8.94905117991305e-13	1.1096792668009e-7
6:32570375	363	0.489745	7.37542	8.94905117991305e-13	1.1096792668009e-7
6:32570461	363	0.489745	7.37542	8.94905117991305e-13	1.1096792668009e-7
6:32570550	363	0.489745	7.37542	8.94905117991305e-13	1.1096792668009e-7
6:32570571	363	0.489745	7.37542	8.94905117991305e-13	1.1096792668009e-7
6:32570602	363	0.489745	7.37542	8.94905117991305e-13	1.1096792668009e-7
6:32570609	363	0.489745	7.37542	8.94905117991305e-13	1.1096792668009e-7
6:32570717	363	0.489745	7.37542	8.94905117991305e-13	1.1096792668009e-7
6:32570797	363	0.489879	7.3773	8.83825672929197e-13	1.1096792668009e-7
6:32570839	363	0.489745	7.37542	8.94905117991305e-13	1.1096792668009e-7
6:32570894	363	0.489745	7.37542	8.94905117991305e-13	1.1096792668009e-7
6:32571011	363	0.489745	7.37542	8.94905117991305e-13	1.1096792668009e-7
6:32571043	363	0.489745	7.37542	8.94905117991305e-13	1.1096792668009e-7
6:32571227	363	0.489745	7.37542	8.94905117991305e-13	1.1096792668009e-7
6:32572082	363	0.489745	7.37542	8.94905117991305e-13	1.1096792668009e-7
6:32572148	363	0.489745	7.37542	8.94905117991305e-13	1.1096792668009e-7
6:32572179	363	0.489745	7.37542	8.94905117991305e-13	1.1096792668009e-7
6:32572388	363	0.489745	7.37542	8.94905117991305e-13	1.1096792668009e-7
6:32572547	363	0.489745	7.37542	8.94905117991305e-13	1.1096792668009e-7
6:32572695	363	0.489745	7.37542	8.94905117991305e-13	1.1096792668009e-7
6:32572701	363	0.489745	7.37542	8.94905117991305e-13	1.1096792668009e-7
6:32572757	363	0.489745	7.37542	8.94905117991305e-13	1.1096792668009e-7
6:32573574	363	0.489745	7.37542	8.94905117991305e-13	1.1096792668009e-7
6:32573598	363	0.489745	7.37542	8.94905117991305e-13	1.1096792668009e-7
6:32573748	363	0.489745	7.37542	8.94905117991305e-13	1.1096792668009e-7
6:32573780	363	0.489745	7.37542	8.94905117991305e-13	1.1096792668009e-7
6:32574027	363	0.489745	7.37542	8.94905117991305e-13	1.1096792668009e-7
6:32574130	363	0.489745	7.37542	8.94905117991305e-13	1.1096792668009e-7
6:32574438	363	0.489745	7.37542	8.94905117991305e-13	1.1096792668009e-7
6:32575631	363	0.489745	7.37542	8.94905117991305e-13	1.1096792668009e-7
6:32575674	363	0.489745	7.37542	8.94905117991305e-13	1.1096792668009e-7
6:32575803	363	0.489745	7.37542	8.94905117991305e-13	1.1096792668009e-7
6:32575873	363	0.489745	7.37542	8.94905117991305e-13	1.1096792668009e-7
6:32575930	363	0.489745	7.37542	8.94905117991305e-13	1.1096792668009e-7
6:32576177	363	0.489745	7.37542	8.94905117991305e-13	1.1096792668009e-7
6:32576247	363	0.489745	7.37542	8.94905117991305e-13	1.1096792668009e-7
6:32576296	363	0.489745	7.37542	8.94905117991305e-13	1.1096792668009e-7
6:32576426	363	0.490358	7.38222	8.55439137924244e-13	1.1096792668009e-7
6:32576478	363	0.489745	7.37542	8.94905117991305e-13	1.1096792668009e-7
6:32576493	363	0.489745	7.37542	8.94905117991305e-13	1.1096792668009e-7
6:32576633	363	0.489797	7.37608	8.91002006574632e-13	1.1096792668009e-7
6:32577715	363	0.489745	7.37542	8.94905117991305e-13	1.1096792668009e-7
6:32577733	363	0.489745	7.37542	8.94905117991305e-13	1.1096792668009e-7
6:32577889	363	0.489745	7.37542	8.94905117991305e-13	1.1096792668009e-7
6:32577975	363	0.489745	7.37542	8.94905117991305e-13	1.1096792668009e-7
6:32577981	363	0.489745	7.37542	8.94905117991305e-13	1.1096792668009e-7
6:32578040	363	0.489745	7.37542	8.94905117991305e-13	1.1096792668009e-7
6:32578191	363	0.48976	7.37563	8.937007607494e-13	1.1096792668009e-7
6:32578530	363	0.489745	7.37542	8.94905117991305e-13	1.1096792668009e-7
6:32578566	363	0.489745	7.37542	8.94905117991305e-13	1.1096792668009e-7
6:32578612	363	0.489745	7.37542	8.94905117991305e-13	1.1096792668009e-7
6:32578673	363	0.489745	7.37542	8.94905117991305e-13	1.1096792668009e-7
6:32578726	363	0.489745	7.37542	8.94905117991305e-13	1.1096792668009e-7
6:32578756	363	0.489745	7.37542	8.94905117991305e-13	1.1096792668009e-7
6:32578818	363	0.489745	7.37542	8.94905117991305e-13	1.1096792668009e-7
6:32578837	363	0.489745	7.37542	8.94905117991305e-13	1.1096792668009e-7
6:32578941	363	0.489745	7.37542	8.94905117991305e-13	1.1096792668009e-7
6:32579035	363	0.489786	7.37596	8.91728342970613e-13	1.1096792668009e-7
6:32579940	363	0.489745	7.37542	8.94905117991305e-13	1.1096792668009e-7
6:32580084	363	0.489745	7.37542	8.94905117991305e-13	1.1096792668009e-7
6:32580112	363	0.489745	7.37542	8.94905117991305e-13	1.1096792668009e-7
6:32580288	363	0.489745	7.37542	8.94905117991305e-13	1.1096792668009e-7
6:32580357	363	0.489745	7.37542	8.94905117991305e-13	1.1096792668009e-7
6:32580456	363	0.489745	7.37542	8.94905117991305e-13	1.1096792668009e-7
6:32580507	363	0.489745	7.37542	8.94905117991305e-13	1.1096792668009e-7
6:32580741	363	0.489745	7.37542	8.94905117991305e-13	1.1096792668009e-7
6:32582601	363	0.482689	7.37938	8.7168822104787e-13	1.1096792668009e-7
6:32621333	363	0.741724	7.37121	9.20312142803942e-13	1.14039903189271e-7
6:32503875	363	0.611645	7.3684	9.37614273592928e-13	1.16104034429311e-7
6:32574602	363	0.489716	7.36303	9.71586647528238e-13	1.20228175594185e-7
6:32565115	363	-0.494135	-7.34659	1.08340897506256e-12	1.33973521036708e-7
6:32571962	363	0.487321	7.34377	1.10376612535824e-12	1.36397255456092e-7
12:69812494	476	0.286754	7.44171	5.7552118271071e-13	1.41847849210872e-7
12:69816761	476	0.286754	7.44171	5.7552118271071e-13	1.41847849210872e-7
12:69818080	476	0.286754	7.44171	5.7552118271071e-13	1.41847849210872e-7
12:69818346	476	0.286754	7.44171	5.7552118271071e-13	1.41847849210872e-7
12:69614374	476	-0.367397	-7.43354	6.07807677142266e-13	1.49235850948831e-7
12:69751434	306	-0.310825	-7.43366	6.07302153633235e-13	1.49235850948831e-7
6:32561068	363	-0.461142	-7.32684	1.23452968800873e-12	1.52451724251587e-7
6:32565884	363	-0.485749	-7.32176	1.27663972159819e-12	1.57328381395299e-7
6:32565905	363	-0.485749	-7.32176	1.27663972159819e-12	1.57328381395299e-7
6:32566101	363	-0.485755	-7.32185	1.27585224852272e-12	1.57328381395299e-7
6:32565940	363	-0.485735	-7.32069	1.2856758316426e-12	1.58333658988923e-7
6:32613273	363	-0.531499	-7.31917	1.29861928283557e-12	1.59818431774186e-7
6:32151443	363	0.984553	7.30446	1.43093172502928e-12	1.75981648666289e-7
6:32149801	363	0.984381	7.30149	1.45924703086635e-12	1.79341559632835e-7
12:69618568	476	-0.359659	-7.38931	8.16048844558973e-13	1.98105827538288e-7
12:69619982	476	-0.359659	-7.38931	8.16048844558973e-13	1.98105827538288e-7
12:69628309	476	-0.35967	-7.38965	8.14213953195913e-13	1.98105827538288e-7
12:69660703	476	-0.359659	-7.38931	8.16048844558973e-13	1.98105827538288e-7
12:69663852	476	-0.359659	-7.38931	8.16048844558973e-13	1.98105827538288e-7
12:69671209	476	-0.359659	-7.38931	8.16048844558973e-13	1.98105827538288e-7
6:32607477	363	-0.532871	-7.28263	1.65207263304276e-12	2.02901434495068e-7
12:69761996	306	-0.308445	-7.37867	8.75808173444954e-13	2.11816830892002e-7
12:69769538	306	-0.308447	-7.37871	8.75613035969535e-13	2.11816830892002e-7
[truncated: 13,858 more rows]
