# Supplementary material for: Tensor decomposition of stimulated monocyte and macrophage gene expression profiles identifies neurodegenerative disease-specific trans-eQTLs
Source: PLOS journal article supplement (doi:10.1371/journal.pgen.1008549), 2020-02-03
Supplement: S18 (10.1371/journal.pgen.1008549.s018) [file journal.pgen.1008549.s018]

Pathway Analysis: clu\_c1q p-value: < 2e-03  
Network: GeNets Meta network v1.0 Geneset: clu\_c1q

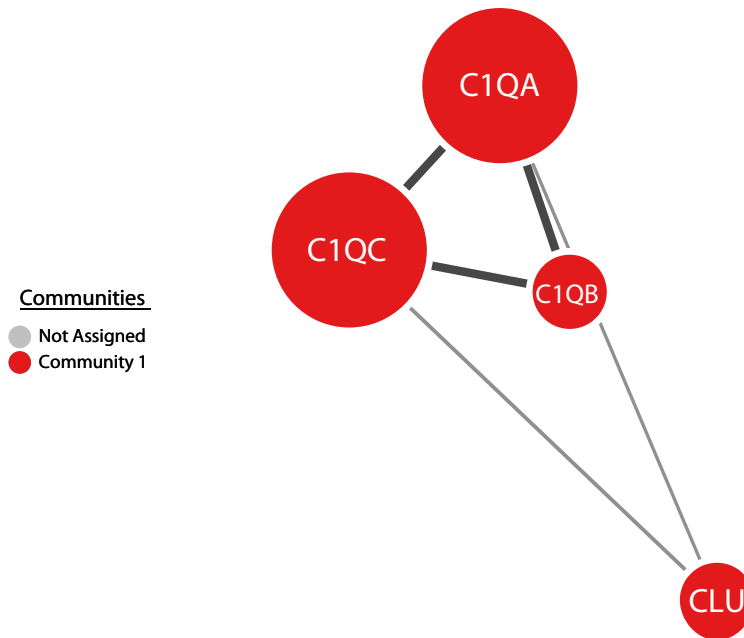

**S18 Fig. Protein-protein interaction (PPI) network of protein products of *CLU*, *C1QA*, *C1QB* and *C1QC*.** The PPI suggests that the products of CLU physically interacts with complement proteins. The PPI was generated with GeNets Meta network v1.0 database.
